# Supplementary material
Source: publisher site journal article supplement (https://www.spandidos-publications.com/7778/downloadSupplementary)
Supplement: Supplementary file 1 [file downloadSupplementary]

## Sheet: Supplement Table 1
Table SI. Marker genes from 30 clusters.
Gene	P-value	avg_log2FoldChange	pct.1	pct.2	adjusted P-value	cluster	Gene
HSD17B6	0	3.25612	0.919	0.159	0	0	HSD17B6
ORM2	0	2.3045	0.944	0.193	0	0	ORM2
ITIH2	0	2.10486	0.967	0.218	0	0	ITIH2		pct, percentage.
PAH	0	2.86897	0.951	0.204	0	0	PAH
F2	0	2.0731	0.954	0.21	0	0	F2
AZGP1	0	2.27807	0.971	0.228	0	0	AZGP1
HMGCS2	0	2.86336	0.95	0.208	0	0	HMGCS2
ANGPTL3	0	2.66791	0.938	0.198	0	0	ANGPTL3
AGT	0	2.37751	0.969	0.234	0	0	AGT
CPB2	0	2.43421	0.916	0.185	0	0	CPB2
C4BPA	0	2.70967	0.941	0.21	0	0	C4BPA
GSTA1	0	3.34506	0.942	0.214	0	0	GSTA1
RARRES2	0	2.34713	0.975	0.248	0	0	RARRES2
AGXT	0	2.89979	0.957	0.231	0	0	AGXT
ADH1B	0	2.93334	0.962	0.236	0	0	ADH1B
HPX	0	2.85955	0.935	0.21	0	0	HPX
SERPINA6	0	2.50898	0.92	0.195	0	0	SERPINA6
C1S	0	2.30594	0.922	0.198	0	0	C1S
MASP2	0	3.30445	0.844	0.121	0	0	MASP2
RIDA	0	2.99018	0.931	0.21	0	0	RIDA
SERPIND1	0	2.13532	0.888	0.168	0	0	SERPIND1
SLC2A2	0	2.19509	0.889	0.173	0	0	SLC2A2
CFHR1	0	2.94247	0.949	0.233	0	0	CFHR1
PCK1	0	3.13517	0.882	0.167	0	0	PCK1
C1R	0	2.30735	0.919	0.205	0	0	C1R
APOB	0	2.38935	0.972	0.258	0	0	APOB
VTN	0	1.99998	0.991	0.279	0	0	VTN
C4BPB	0	2.67986	0.873	0.165	0	0	C4BPB
CPS1	0	2.17389	0.915	0.208	0	0	CPS1
C5	0	2.59631	0.884	0.177	0	0	C5
MGST1	0	2.18197	0.969	0.262	0	0	MGST1
ORM1	0	2.27163	0.965	0.258	0	0	ORM1
AHSG	0	2.0493	0.943	0.238	0	0	AHSG
C8G	0	2.8069	0.844	0.143	0	0	C8G
KNG1	0	2.86792	0.97	0.274	0	0	KNG1
BHMT	0	3.31812	0.819	0.124	0	0	BHMT
ITIH1	0	2.4572	0.858	0.164	0	0	ITIH1
SERPINC1	0	2.94445	0.966	0.272	0	0	SERPINC1
BAAT	0	2.95722	0.882	0.188	0	0	BAAT
UGT2B4	0	3.19067	0.833	0.139	0	0	UGT2B4
TM4SF4	0	1.48553	0.952	0.26	0	0	TM4SF4
CFH	0	2.63061	0.959	0.268	0	0	CFH
ANG	0	2.19134	0.948	0.257	0	0	ANG
HRG	0	2.97199	0.959	0.269	0	0	HRG
FN1	0	1.9088	0.955	0.266	0	0	FN1
ASGR2	0	2.33461	0.871	0.187	0	0	ASGR2
UGT2B15	0	2.29387	0.849	0.168	0	0	UGT2B15
ACSM2A	0	3.38111	0.796	0.116	0	0	ACSM2A
FABP1	0	3.25012	0.872	0.192	0	0	FABP1
C3	0	2.23135	0.964	0.285	0	0	C3
AKR1C3	0	2.08737	0.917	0.238	0	0	AKR1C3
ACSM2B	0	2.80159	0.815	0.136	0	0	ACSM2B
ALDOB	0	3.14169	0.961	0.284	0	0	ALDOB
ITIH3	0	2.55716	0.865	0.188	0	0	ITIH3
CYP2C9	0	2.69916	0.836	0.16	0	0	CYP2C9
ADH1C	0	2.4525	0.845	0.17	0	0	ADH1C
SULT2A1	0	3.02192	0.803	0.131	0	0	SULT2A1
ADH1A	0	2.90062	0.814	0.146	0	0	ADH1A
MAT1A	0	3.21061	0.779	0.115	0	0	MAT1A
EPHX1	0	3.01054	0.972	0.308	0	0	EPHX1
GC	0	2.42054	0.998	0.334	0	0	GC
PON1	0	2.32586	0.812	0.149	0	0	PON1
TF	0	3.06435	0.971	0.308	0	0	TF
SDC2	0	2.53928	0.864	0.201	0	0	SDC2
ASGR1	0	2.5098	0.847	0.185	0	0	ASGR1
ASS1	0	2.58341	0.84	0.179	0	0	ASS1
PON3	0	1.88422	0.813	0.153	0	0	PON3
FGA	0	2.65664	0.981	0.321	0	0	FGA
PLG	0	2.89633	0.783	0.125	0	0	PLG
HSD11B1	0	2.99422	0.792	0.138	0	0	HSD11B1
SERPINF1	0	2.58953	0.861	0.207	0	0	SERPINF1
ADH4	0	3.30114	0.838	0.185	0	0	ADH4
CP	0	1.76869	0.852	0.2	0	0	CP
F5	0	2.14571	0.826	0.174	0	0	F5
HGD	0	3.02327	0.784	0.133	0	0	HGD
G6PC	0	3.35377	0.762	0.112	0	0	G6PC
HPD	0	3.15907	0.796	0.146	0	0	HPD
APOM	0	2.13258	0.819	0.169	0	0	APOM
TMEM176A	0	2.00485	0.916	0.267	0	0	TMEM176A
ALDH6A1	0	2.32501	0.85	0.205	0	0	ALDH6A1
TMEM176B	0	1.84329	0.951	0.309	0	0	TMEM176B
SLC38A4	0	2.80049	0.783	0.142	0	0	SLC38A4
CES2	0	1.86222	0.821	0.183	0	0	CES2
PTGR1	0	2.3357	0.831	0.196	0	0	PTGR1
CLU	0	1.93409	0.997	0.362	0	0	CLU
SERPINF2	0	2.67259	0.784	0.149	0	0	SERPINF2
HP	0	3.57737	0.961	0.327	0	0	HP
PGRMC1	0	2.2432	0.884	0.252	0	0	PGRMC1
CDO1	0	3.20884	0.739	0.107	0	0	CDO1
SLC10A1	0	2.88771	0.745	0.114	0	0	SLC10A1
AMBP	0	2.49067	0.995	0.368	0	0	AMBP
ALDH1A1	0	2.23217	0.939	0.313	0	0	ALDH1A1
AADAC	0	2.45073	0.747	0.126	0	0	AADAC
CFHR3	0	3.61933	0.719	0.098	0	0	CFHR3
SERPINA5	0	2.33167	0.768	0.147	0	0	SERPINA5
TFR2	0	2.40443	0.751	0.131	0	0	TFR2
FGB	0	2.88564	0.969	0.35	0	0	FGB
TAT	0	2.89395	0.814	0.195	0	0	TAT
CYP2C8	0	3.04471	0.753	0.135	0	0	CYP2C8
HAAO	0	2.82513	0.763	0.145	0	0	HAAO
FGL1	0	2.71856	0.785	0.169	0	0	FGL1
FGG	0	2.80016	0.986	0.37	0	0	FGG
APOH	0	2.90694	0.979	0.364	0	0	APOH
SELENBP1	0	2.60777	0.761	0.147	0	0	SELENBP1
LEAP2	0	2.73915	0.754	0.14	0	0	LEAP2
KHK	0	3.05136	0.721	0.108	0	0	KHK
CYB5A	0	2.64236	0.989	0.376	0	0	CYB5A
BNIP3	0	2.23462	0.8	0.187	0	0	BNIP3
AFM	0	3.406	0.694	0.082	0	0	AFM
BHMT2	0	2.7629	0.726	0.115	0	0	BHMT2
IGFBP1	0	3.19333	0.786	0.178	0	0	IGFBP1
GPX3	0	1.99003	0.877	0.269	0	0	GPX3
GAMT	0	2.203	0.817	0.21	0	0	GAMT
MTTP	0	2.70824	0.719	0.116	0	0	MTTP
C8B	0	2.19321	0.73	0.131	0	0	C8B
AKR1C4	0	3.46538	0.72	0.122	0	0	AKR1C4
PROC	0	2.15135	0.731	0.139	0	0	PROC
MPST	0	1.67541	0.842	0.25	0	0	MPST
RBP4	0	2.59963	0.99	0.399	0	0	RBP4
LECT2	0	3.48981	0.69	0.099	0	0	LECT2
A1CF	0	2.17394	0.737	0.146	0	0	A1CF
TTR	0	3.00286	0.977	0.387	0	0	TTR
AKR1C1	0	2.28184	0.752	0.163	0	0	AKR1C1
AKR1C2	0	2.59761	0.721	0.133	0	0	AKR1C2
KRT18	0	0.964275	0.802	0.215	0	0	KRT18
SLC38A3	0	3.15878	0.676	0.089	0	0	SLC38A3
EFNA1	0	2.05431	0.764	0.178	0	0	EFNA1
MSMO1	0	3.07946	0.722	0.138	0	0	MSMO1
ACAT1	0	2.05111	0.898	0.315	0	0	ACAT1
EHHADH	0	2.93774	0.694	0.111	0	0	EHHADH
RBP5	0	2.54123	0.718	0.135	0	0	RBP5
GLYAT	0	3.40626	0.659	0.077	0	0	GLYAT
CFHR5	0	4.00378	0.653	0.072	0	0	CFHR5
UGT2B7	0	2.5461	0.715	0.134	0	0	UGT2B7
ECI2	0	2.21405	0.85	0.269	0	0	ECI2
SERPINA4	0	2.12786	0.717	0.137	0	0	SERPINA4
DPYS	0	3.32718	0.656	0.078	0	0	DPYS
MPC2	0	1.9879	0.962	0.384	0	0	MPC2
SLC27A5	0	3.21496	0.67	0.094	0	0	SLC27A5
DCXR	0	2.43289	0.961	0.385	0	0	DCXR
NUPR1	0	1.48891	0.809	0.235	0	0	NUPR1
RAMP1	0	3.27548	0.645	0.074	0	0	RAMP1
APOA1	0	2.76335	0.97	0.399	0	0	APOA1
GATM	0	2.61404	0.87	0.299	0	0	GATM
CYP3A5	0	2.47777	0.724	0.154	0	0	CYP3A5
CMBL	0	2.37313	0.711	0.141	0	0	CMBL
F10	0	3.25733	0.648	0.081	0	0	F10
HFE2	0	2.99489	0.651	0.085	0	0	HFE2
CERS2	0	1.8308	0.831	0.267	0	0	CERS2
PCBD1	0	1.59751	0.878	0.319	0	0	PCBD1
GJB1	0	2.27308	0.679	0.122	0	0	GJB1
2025-03-02	0	2.76115	0.657	0.102	0	0	2025-03-02
PIPOX	0	2.5905	0.664	0.111	0	0	PIPOX
TFPI	0	0.88822	0.817	0.264	0	0	TFPI
DHCR24	0	2.01704	0.7	0.149	0	0	DHCR24
RGN	0	3.07185	0.629	0.08	0	0	RGN
CYP4A11	0	2.43522	0.663	0.116	0	0	CYP4A11
CYP27A1	0	2.20797	0.688	0.141	0	0	CYP27A1
F12	0	2.45373	0.659	0.116	0	0	F12
ETFB	0	1.91285	0.859	0.317	0	0	ETFB
CFI	0	2.5206	0.656	0.114	0	0	CFI
C3P1	0	2.77554	0.639	0.099	0	0	C3P1
SEPHS2	0	1.50327	0.799	0.259	0	0	SEPHS2
PTP4A1	0	1.65976	0.92	0.381	0	0	PTP4A1
IDH1	0	1.67071	0.794	0.256	0	0	IDH1
ACADSB	0	2.27605	0.678	0.14	0	0	ACADSB
PHYH	0	1.55809	0.771	0.234	0	0	PHYH
TST	0	1.89281	0.697	0.16	0	0	TST
SERPING1	0	1.88634	0.996	0.459	0	0	SERPING1
PCK2	0	2.61266	0.69	0.155	0	0	PCK2
APOC3	0	3.06262	0.969	0.434	0	0	APOC3
PPP1R16A	0	2.59959	0.647	0.114	0	0	PPP1R16A
MYO1B	0	2.13321	0.675	0.143	0	0	MYO1B
BPHL	0	2.49564	0.665	0.133	0	0	BPHL
HPR	0	3.67625	0.612	0.083	0	0	HPR
SLCO1B1	0	2.87015	0.618	0.09	0	0	SLCO1B1
HPN	0	0.929128	0.681	0.154	0	0	HPN
ERRFI1	0	2.36493	0.712	0.185	0	0	ERRFI1
CYP7A1	0	3.61204	0.579	0.052	0	0	CYP7A1
TM7SF2	0	2.98634	0.614	0.089	0	0	TM7SF2
ADI1	0	1.82542	0.929	0.404	0	0	ADI1
GRHPR	0	1.91835	0.813	0.288	0	0	GRHPR
APOE	0	2.47748	0.97	0.447	0	0	APOE
LINC00844	0	2.92823	0.599	0.077	0	0	LINC00844
FGGY	0	1.78471	0.701	0.18	0	0	FGGY
POR	0	1.93597	0.758	0.238	0	0	POR
APCS	0	2.73556	0.748	0.228	0	0	APCS
CTH	0	3.38527	0.605	0.086	0	0	CTH
C8A	0	2.16184	0.633	0.114	0	0	C8A
TCEA3	0	2.22538	0.644	0.125	0	0	TCEA3
F7	0	3.54268	0.571	0.052	0	0	F7
ALAS1	0	2.51633	0.681	0.165	0	0	ALAS1
F13B	0	2.77999	0.607	0.091	0	0	F13B
INSIG1	0	2.01897	0.81	0.294	0	0	INSIG1
ALDH3A2	0	1.85669	0.732	0.217	0	0	ALDH3A2
PPP1R1A	0	3.45046	0.581	0.066	0	0	PPP1R1A
AL591485.1	0	3.23744	0.628	0.114	0	0	AL591485.1
CISD3	0	1.36948	0.801	0.288	0	0	CISD3
CALD1	0	0.516814	0.738	0.227	0	0	CALD1
HAGH	0	1.8009	0.712	0.201	0	0	HAGH
ECHDC2	0	1.9792	0.662	0.153	0	0	ECHDC2
ALDH7A1	0	2.30513	0.637	0.129	0	0	ALDH7A1
APOA5	0	1.48434	0.631	0.125	0	0	APOA5
GADD45G	0	1.65593	0.748	0.242	0	0	GADD45G
ADH6	0	2.78934	0.611	0.105	0	0	ADH6
ECHS1	0	1.61373	0.926	0.421	0	0	ECHS1
PROX1	0	2.4805	0.608	0.103	0	0	PROX1
GNMT	0	3.22808	0.617	0.112	0	0	GNMT
CBR1	0	1.36457	0.844	0.344	0	0	CBR1
PDZK1	0	2.56655	0.598	0.098	0	0	PDZK1
GGH	0	2.56945	0.671	0.175	0	0	GGH
ARG1	0	1.67671	0.659	0.163	0	0	ARG1
FAM213A	0	1.58581	0.718	0.222	0	0	FAM213A
TMEM56	0	2.08431	0.615	0.12	0	0	TMEM56
PTMS	0	1.47446	0.854	0.359	0	0	PTMS
CCL16	0	2.91826	0.577	0.084	0	0	CCL16
CFHR4	0	3.99869	0.533	0.042	0	0	CFHR4
TMEM205	0	1.34388	0.82	0.331	0	0	TMEM205
C6	0	2.27329	0.596	0.108	0	0	C6
PRDX2	0	1.18697	0.833	0.346	0	0	PRDX2
SIGMAR1	0	1.13218	0.745	0.259	0	0	SIGMAR1
QPRT	0	1.92238	0.672	0.187	0	0	QPRT
UPB1	0	2.33059	0.589	0.104	0	0	UPB1
ALDH2	0	1.18476	0.881	0.397	0	0	ALDH2
PRG4	0	2.6343	0.612	0.128	0	0	PRG4
KLKB1	0	2.8995	0.567	0.083	0	0	KLKB1
TM4SF5	0	1.98161	0.601	0.118	0	0	TM4SF5
SLC22A7	0	3.13411	0.55	0.068	0	0	SLC22A7
MAOB	0	2.2615	0.592	0.111	0	0	MAOB
CRYL1	0	1.77713	0.702	0.221	0	0	CRYL1
UGT2B10	0	3.08082	0.554	0.075	0	0	UGT2B10
APOA2	0	3.0467	0.97	0.492	0	0	APOA2
TMEM14A	0	1.47528	0.673	0.196	0	0	TMEM14A
CES1	0	3.21908	0.566	0.089	0	0	CES1
CAT	0	1.5258	0.871	0.396	0	0	CAT
FAH	0	2.26385	0.598	0.124	0	0	FAH
C2	0	1.23532	0.695	0.221	0	0	C2
PRDX6	0	1.78381	0.95	0.478	0	0	PRDX6
SLC27A2	0	3.05237	0.556	0.085	0	0	SLC27A2
MST1	0	2.81303	0.552	0.081	0	0	MST1
IGF1	0	2.11637	0.608	0.138	0	0	IGF1
PXMP2	0	1.9527	0.61	0.14	0	0	PXMP2
EBPL	0	1.64479	0.666	0.197	0	0	EBPL
ABAT	0	2.18289	0.588	0.12	0	0	ABAT
AOX1	0	3.40287	0.532	0.065	0	0	AOX1
MLXIPL	0	3.07028	0.538	0.072	0	0	MLXIPL
SLPI	0	2.16132	0.66	0.194	0	0	SLPI
CYP2A6	0	3.36768	0.598	0.132	0	0	CYP2A6
APOC1	0	2.98483	0.973	0.508	0	0	APOC1
ADH5	0	1.44965	0.717	0.252	0	0	ADH5
ACSL1	0	1.32092	0.71	0.246	0	0	ACSL1
NR1I3	0	3.01186	0.544	0.081	0	0	NR1I3
SDC1	0	1.74027	0.614	0.152	0	0	SDC1
MTHFD1	0	2.10972	0.633	0.172	0	0	MTHFD1
HINT2	0	1.06537	0.767	0.306	0	0	HINT2
CADM1	0	1.39053	0.64	0.18	0	0	CADM1
AIG1	0	1.41161	0.706	0.246	0	0	AIG1
TSTD1	0	1.46646	0.767	0.309	0	0	TSTD1
AQP9	0	1.91048	0.574	0.116	0	0	AQP9
CLDN1	0	1.31578	0.621	0.163	0	0	CLDN1
H1F0	0	1.05545	0.738	0.28	0	0	H1F0
SORD	0	2.93149	0.531	0.075	0	0	SORD
FMO3	0	2.48323	0.545	0.09	0	0	FMO3
ACAA1	0	1.62212	0.746	0.291	0	0	ACAA1
ANGPTL4	0	2.90283	0.54	0.085	0	0	ANGPTL4
ENTPD5	0	2.07268	0.583	0.128	0	0	ENTPD5
DDT	0	1.36188	0.934	0.481	0	0	DDT
SDHC	0	1.30192	0.745	0.295	0	0	SDHC
ATOX1	0	1.42642	0.912	0.463	0	0	ATOX1
DECR2	0	2.0571	0.577	0.131	0	0	DECR2
FTCD	0	2.76051	0.525	0.081	0	0	FTCD
GCHFR	0	1.72092	0.611	0.167	0	0	GCHFR
SELENOP	0	0.990145	0.992	0.548	0	0	SELENOP
ABCB4	0	3.05413	0.511	0.069	0	0	ABCB4
REEP6	0	2.42528	0.563	0.121	0	0	REEP6
CIDEB	0	2.05134	0.593	0.151	0	0	CIDEB
MGST2	0	1.33812	0.765	0.325	0	0	MGST2
AC087482.1	0	3.09222	0.5	0.061	0	0	AC087482.1
NDUFB9	0	1.33687	0.898	0.46	0	0	NDUFB9
SCCPDH	0	1.16159	0.654	0.217	0	0	SCCPDH
ACMSD	0	1.82989	0.545	0.108	0	0	ACMSD
ECI1	0	1.60524	0.638	0.202	0	0	ECI1
ACADM	0	1.29628	0.685	0.25	0	0	ACADM
MRPL41	0	1.04753	0.795	0.362	0	0	MRPL41
SCP2	0	1.2185	0.934	0.502	0	0	SCP2
MRPL55	0	1.19507	0.748	0.317	0	0	MRPL55
ETNPPL	0	3.38789	0.491	0.06	0	0	ETNPPL
CHCHD10	0	1.33509	0.835	0.404	0	0	CHCHD10
PECR	0	2.11324	0.549	0.119	0	0	PECR
GOT2	0	1.63487	0.595	0.165	0	0	GOT2
SPP2	0	2.97092	0.524	0.095	0	0	SPP2
SLC25A1	0	1.7716	0.595	0.166	0	0	SLC25A1
SERPINA11	0	1.86979	0.563	0.134	0	0	SERPINA11
NR1H4	0	2.3988	0.517	0.089	0	0	NR1H4
FH	0	1.52569	0.637	0.209	0	0	FH
CYP2D6	0	2.3603	0.529	0.101	0	0	CYP2D6
NDUFC2	0	1.06788	0.777	0.349	0	0	NDUFC2
KRT8	0	0.695049	0.605	0.177	0	0	KRT8
CAMK2N1	0	1.9269	0.543	0.116	0	0	CAMK2N1
ACAA2	0	1.56074	0.733	0.307	0	0	ACAA2
METTL7A	0	0.948982	0.763	0.339	0	0	METTL7A
ZNHIT1	0	1.15495	0.82	0.397	0	0	ZNHIT1
HSD17B4	0	1.73584	0.641	0.219	0	0	HSD17B4
ACOT13	0	1.79092	0.613	0.192	0	0	ACOT13
BDH1	0	2.78204	0.486	0.065	0	0	BDH1
FUOM	0	1.35583	0.639	0.22	0	0	FUOM
HAO1	0	2.45253	0.502	0.084	0	0	HAO1
GOT1	0	1.6122	0.604	0.186	0	0	GOT1
HSD17B13	0	3.41268	0.491	0.073	0	0	HSD17B13
SERPINA10	0	2.13338	0.525	0.108	0	0	SERPINA10
GLYCTK	0	2.1483	0.53	0.114	0	0	GLYCTK
PRDX3	0	0.979835	0.884	0.468	0	0	PRDX3
COBLL1	0	1.59977	0.563	0.147	0	0	COBLL1
IGFBP2	0	2.8548	0.534	0.119	0	0	IGFBP2
NIPSNAP1	0	1.64022	0.565	0.151	0	0	NIPSNAP1
ALAD	0	2.07414	0.534	0.121	0	0	ALAD
LBP	0	2.90129	0.494	0.081	0	0	LBP
QDPR	0	1.78497	0.572	0.159	0	0	QDPR
SHMT1	0	1.72689	0.574	0.161	0	0	SHMT1
CRYZ	0	1.37899	0.598	0.186	0	0	CRYZ
PGRMC2	0	1.16978	0.647	0.236	0	0	PGRMC2
NDUFB6	0	0.864508	0.821	0.41	0	0	NDUFB6
TTPA	0	3.55413	0.461	0.051	0	0	TTPA
CYP3A4	0	3.65941	0.505	0.095	0	0	CYP3A4
CYP2A7	0	2.57597	0.524	0.114	0	0	CYP2A7
GADD45A	0	1.06543	0.643	0.234	0	0	GADD45A
KIF22	0	1.46092	0.605	0.196	0	0	KIF22
FMO5	0	1.71101	0.543	0.135	0	0	FMO5
SAR1B	0	1.1856	0.672	0.264	0	0	SAR1B
GOLT1A	0	2.52964	0.502	0.094	0	0	GOLT1A
COL18A1	0	1.29092	0.55	0.142	0	0	COL18A1
SORBS2	0	1.21669	0.533	0.126	0	0	SORBS2
PCYOX1	0	1.49937	0.575	0.169	0	0	PCYOX1
ERG28	0	1.81418	0.567	0.161	0	0	ERG28
DHRS1	0	2.20202	0.514	0.109	0	0	DHRS1
PEBP1	0	2.0303	0.994	0.59	0	0	PEBP1
MRPL24	0	1.27924	0.618	0.214	0	0	MRPL24
ATP5MC1	0	0.922802	0.763	0.359	0	0	ATP5MC1
RDH16	0	2.88414	0.468	0.065	0	0	RDH16
MGMT	0	1.07032	0.657	0.255	0	0	MGMT
MGST3	0	0.669604	0.832	0.43	0	0	MGST3
SMIM14	0	1.05786	0.686	0.285	0	0	SMIM14
SERPINA7	0	2.7937	0.475	0.074	0	0	SERPINA7
TOB1	0	0.939104	0.644	0.244	0	0	TOB1
ALDH1L1	0	2.92169	0.46	0.061	0	0	ALDH1L1
SUCLG2	0	1.21445	0.625	0.226	0	0	SUCLG2
PROS1	0	1.21454	0.581	0.182	0	0	PROS1
SDS	0	2.61006	0.604	0.206	0	0	SDS
STARD10	0	1.93884	0.522	0.124	0	0	STARD10
DECR1	0	0.965539	0.827	0.429	0	0	DECR1
PGLYRP2	0	2.66109	0.482	0.085	0	0	PGLYRP2
OAF	0	2.12949	0.495	0.1	0	0	OAF
F11	0	2.75508	0.468	0.074	0	0	F11
FAM162A	0	1.02502	0.697	0.304	0	0	FAM162A
COA3	0	0.89691	0.708	0.315	0	0	COA3
HIST1H1C	0	1.0515	0.813	0.421	0	0	HIST1H1C
MRPL14	0	0.984069	0.661	0.27	0	0	MRPL14
HSDL2	0	1.40081	0.573	0.182	0	0	HSDL2
CARHSP1	0	0.858239	0.63	0.24	0	0	CARHSP1
NDUFC1	0	0.846923	0.843	0.453	0	0	NDUFC1
SMLR1	0	2.36447	0.47	0.08	0	0	SMLR1
MAOA	0	2.00863	0.491	0.102	0	0	MAOA
LIPC	0	3.8263	0.424	0.036	0	0	LIPC
CYP8B1	0	3.45602	0.432	0.044	0	0	CYP8B1
P4HB	0	0.779606	0.868	0.48	0	0	P4HB
SC5D	0	1.6533	0.537	0.15	0	0	SC5D
CYP2J2	0	2.12154	0.477	0.09	0	0	CYP2J2
HADHB	0	0.89149	0.744	0.359	0	0	HADHB
DAO	0	3.14923	0.438	0.053	0	0	DAO
CYP4F3	0	2.09139	0.479	0.095	0	0	CYP4F3
FBXO2	0	3.09775	0.435	0.052	0	0	FBXO2
ALB	0	2.41585	0.996	0.613	0	0	ALB
HIBADH	0	1.40432	0.561	0.179	0	0	HIBADH
EBNA1BP2	0	1.50972	0.547	0.165	0	0	EBNA1BP2
CHPT1	0	1.25956	0.572	0.19	0	0	CHPT1
TOR1AIP2	0	1.38633	0.559	0.178	0	0	TOR1AIP2
ECH1	0	0.917528	0.881	0.5	0	0	ECH1
HIST1H2AC	0	1.48656	0.534	0.153	0	0	HIST1H2AC
SEC14L2	0	3.11191	0.426	0.046	0	0	SEC14L2
PON2	0	0.949188	0.585	0.206	0	0	PON2
C1orf115	0	2.05828	0.482	0.105	0	0	C1orf115
ANXA10	0	1.85363	0.468	0.092	0	0	ANXA10
HSD17B11	0	0.710925	0.781	0.405	0	0	HSD17B11
HADH	0	1.48521	0.541	0.166	0	0	HADH
SLC2A4RG	0	1.72093	0.492	0.118	0	0	SLC2A4RG
GLRX5	0	1.12671	0.579	0.205	0	0	GLRX5
HSD17B10	0	1.3367	0.625	0.252	0	0	HSD17B10
HACD3	0	1.12713	0.585	0.212	0	0	HACD3
ANAPC11	0	0.752326	0.872	0.499	0	0	ANAPC11
EBP	0	1.62802	0.542	0.169	0	0	EBP
MCFD2	0	1.05779	0.651	0.278	0	0	MCFD2
LAMTOR2	0	0.795058	0.763	0.392	0	0	LAMTOR2
SDC4	0	1.67785	0.501	0.13	0	0	SDC4
ETFA	0	0.755734	0.724	0.353	0	0	ETFA
NUDT5	0	0.94261	0.625	0.254	0	0	NUDT5
MT1X	0	3.07397	0.583	0.214	0	0	MT1X
ST6GAL1	0	0.681506	0.728	0.36	0	0	ST6GAL1
TMCO1	0	0.727166	0.736	0.368	0	0	TMCO1
MRPL57	0	0.838171	0.837	0.469	0	0	MRPL57
PBLD	0	2.05233	0.461	0.095	0	0	PBLD
NFIA	0	1.25275	0.533	0.167	0	0	NFIA
MT1E	0	2.97638	0.631	0.265	0	0	MT1E
DHRS3	0	0.962902	0.585	0.22	0	0	DHRS3
NDUFB7	0	0.700169	0.821	0.456	0	0	NDUFB7
NDUFAB1	0	0.653391	0.755	0.391	0	0	NDUFAB1
ASPDH	0	3.73256	0.396	0.032	0	0	ASPDH
MTCO1P12	0	0.740456	0.734	0.37	0	0	MTCO1P12
CUTA	0	0.769213	0.868	0.505	0	0	CUTA
MRPL40	0	0.92548	0.619	0.256	0	0	MRPL40
SLC25A13	0	1.64075	0.499	0.137	0	0	SLC25A13
ALKBH7	0	0.802128	0.727	0.365	0	0	ALKBH7
UGP2	0	0.849409	0.764	0.403	0	0	UGP2
DUSP23	0	1.08941	0.653	0.293	0	0	DUSP23
FETUB	0	2.7657	0.432	0.072	0	0	FETUB
SERPINA1	0	2.11585	0.999	0.64	0	0	SERPINA1
RNF5	0	0.995904	0.612	0.253	0	0	RNF5
COA4	0	0.951571	0.596	0.238	0	0	COA4
ZSCAN16-AS1	0	1.21822	0.549	0.192	0	0	ZSCAN16-AS1
MSRB2	0	1.09076	0.567	0.21	0	0	MSRB2
LRG1	0	1.18995	0.509	0.152	0	0	LRG1
GPC6	0	2.80071	0.416	0.059	0	0	GPC6
ACO1	0	1.86429	0.473	0.118	0	0	ACO1
GPC3	0	3.09575	0.408	0.053	0	0	GPC3
C11orf54	0	1.57401	0.492	0.137	0	0	C11orf54
AGMO	0	2.47535	0.446	0.091	0	0	AGMO
ASPH	0	1.00086	0.577	0.222	0	0	ASPH
ABCC6	0	2.31414	0.435	0.081	0	0	ABCC6
SRP9	0	0.636051	0.852	0.498	0	0	SRP9
FBP1	0	1.60241	0.57	0.216	0	0	FBP1
ACOX2	0	2.42704	0.425	0.071	0	0	ACOX2
NDUFA5	0	0.687826	0.685	0.332	0	0	NDUFA5
ABCA6	0	2.16913	0.448	0.095	0	0	ABCA6
APOC1P1	0	2.47938	0.432	0.079	0	0	APOC1P1
OCIAD2	0	0.846685	0.56	0.208	0	0	OCIAD2
FIS1	0	0.531888	0.788	0.436	0	0	FIS1
CYP2E1	0	4.46181	0.456	0.105	0	0	CYP2E1
ACOX1	0	1.56757	0.487	0.136	0	0	ACOX1
IRS2	0	1.65639	0.476	0.125	0	0	IRS2
NDUFA2	0	0.853604	0.889	0.539	0	0	NDUFA2
NAXE	0	0.910741	0.601	0.251	0	0	NAXE
ATP1B1	0	0.65538	0.651	0.302	0	0	ATP1B1
HNMT	0	0.556109	0.683	0.334	0	0	HNMT
C12orf57	0	0.541182	0.705	0.356	0	0	C12orf57
RCL1	0	2.54684	0.418	0.069	0	0	RCL1
HIGD1A	0	0.899447	0.638	0.29	0	0	HIGD1A
FAM96A	0	0.619605	0.777	0.43	0	0	FAM96A
TIMM13	0	0.720076	0.681	0.335	0	0	TIMM13
SERINC5	0	1.7684	0.451	0.105	0	0	SERINC5
AR	0	2.60776	0.398	0.052	0	0	AR
HDHD3	0	2.03706	0.433	0.087	0	0	HDHD3
DNPH1	0	1.01379	0.679	0.334	0	0	DNPH1
PCYT2	0	2.09493	0.432	0.087	0	0	PCYT2
TSPAN6	0	1.50021	0.466	0.122	0	0	TSPAN6
GALK1	0	1.45125	0.498	0.154	0	0	GALK1
MTCH2	0	0.906076	0.588	0.244	0	0	MTCH2
IVD	0	1.27692	0.512	0.168	0	0	IVD
POLR2F	0	0.726905	0.636	0.293	0	0	POLR2F
CNIH1	0	0.802735	0.635	0.292	0	0	CNIH1
SOD1	0	1.38072	0.984	0.641	0	0	SOD1
SPRYD4	0	2.04306	0.439	0.096	0	0	SPRYD4
SAT2	0	0.865378	0.646	0.304	0	0	SAT2
UAP1	0	1.55862	0.478	0.136	0	0	UAP1
GALE	0	1.42658	0.478	0.136	0	0	GALE
CTAGE5	0	0.785707	0.604	0.262	0	0	CTAGE5
SDHD	0	0.625903	0.837	0.495	0	0	SDHD
DNAJC19	0	0.749137	0.601	0.259	0	0	DNAJC19
CEBPA	0	1.62646	0.479	0.137	0	0	CEBPA
ZKSCAN1	0	1.29333	0.507	0.166	0	0	ZKSCAN1
RTN4	0	0.787719	0.841	0.5	0	0	RTN4
GLYATL1	0	2.40612	0.42	0.079	0	0	GLYATL1
MCRIP2	0	1.73324	0.472	0.131	0	0	MCRIP2
PGM1	0	1.82452	0.446	0.106	0	0	PGM1
CYP2B6	0	3.4491	0.376	0.036	0	0	CYP2B6
EIF6	0	0.753054	0.659	0.319	0	0	EIF6
HSPA9	0	0.625229	0.739	0.399	0	0	HSPA9
TTC39C	0	1.1876	0.498	0.158	0	0	TTC39C
TTC36	0	3.5289	0.373	0.033	0	0	TTC36
PHPT1	0	0.608539	0.724	0.385	0	0	PHPT1
F9	0	2.74058	0.41	0.071	0	0	F9
SQLE	0	2.40971	0.428	0.089	0	0	SQLE
MT-TE	0	1.36026	0.508	0.169	0	0	MT-TE
C1orf21	0	1.26966	0.539	0.201	0	0	C1orf21
PRAP1	0	2.07359	0.421	0.083	0	0	PRAP1
DPM3	0	1.01342	0.537	0.2	0	0	DPM3
AFMID	0	1.64719	0.463	0.126	0	0	AFMID
DPP4	0	1.35484	0.445	0.108	0	0	DPP4
CENPX	0	0.645022	0.606	0.269	0	0	CENPX
SLC25A25	0	2.11259	0.422	0.086	0	0	SLC25A25
SUCLG1	0	0.85652	0.819	0.484	0	0	SUCLG1
ABCC2	0	2.7171	0.391	0.057	0	0	ABCC2
SLC25A4	0	1.32498	0.459	0.125	0	0	SLC25A4
NTHL1	0	1.80668	0.452	0.119	0	0	NTHL1
NQO2	0	1.2064	0.506	0.174	0	0	NQO2
SLC22A1	0	3.08857	0.383	0.051	0	0	SLC22A1
CFB	0	2.23275	0.412	0.08	0	0	CFB
OSTC	0	0.639976	0.76	0.429	0	0	OSTC
AC105105.2	0	2.63797	0.395	0.064	0	0	AC105105.2
AMDHD1	0	2.36039	0.416	0.085	0	0	AMDHD1
UQCRQ	0	1.8154	0.988	0.657	0	0	UQCRQ
PCCB	0	1.13956	0.511	0.182	0	0	PCCB
MDK	0	1.02688	0.483	0.154	0	0	MDK
CDHR5	0	2.30315	0.397	0.069	0	0	CDHR5
COX20	0	0.620015	0.628	0.3	0	0	COX20
TMEM14B	0	0.548861	0.731	0.403	0	0	TMEM14B
NDUFS4	0	0.564733	0.689	0.361	0	0	NDUFS4
SLC37A4	0	1.45754	0.451	0.124	0	0	SLC37A4
ABCG5	0	2.2483	0.406	0.079	0	0	ABCG5
PAGE2	0	3.1802	0.374	0.047	0	0	PAGE2
TIMM8B	0	0.694071	0.676	0.35	0	0	TIMM8B
HMGCS1	0	1.86206	0.458	0.133	0	0	HMGCS1
BTD	0	1.49049	0.459	0.134	0	0	BTD
DRAIC	0	2.27234	0.408	0.083	0	0	DRAIC
RAB13	0	0.75827	0.532	0.208	0	0	RAB13
YIF1A	0	0.940008	0.54	0.216	0	0	YIF1A
MSRB1	0	1.24672	0.468	0.144	0	0	MSRB1
PSMB5	0	0.582502	0.65	0.326	0	0	PSMB5
POLR2I	0	0.621084	0.611	0.287	0	0	POLR2I
KDELR2	0	0.59175	0.682	0.359	0	0	KDELR2
OTC	0	2.52801	0.384	0.061	0	0	OTC
RNF128	0	2.09702	0.4	0.077	0	0	RNF128
SNHG25	0	1.16444	0.615	0.293	0	0	SNHG25
TMEM141	0	0.920455	0.526	0.205	0	0	TMEM141
TMEM97	0	1.35244	0.459	0.138	0	0	TMEM97
VEGFA	0	0.685372	0.511	0.19	0	0	VEGFA
FDPS	0	1.02885	0.591	0.27	0	0	FDPS
RAD23B	0	0.560998	0.66	0.341	0	0	RAD23B
MUT	0	1.45068	0.444	0.125	0	0	MUT
SERINC2	0	1.84092	0.411	0.092	0	0	SERINC2
CMTM8	0	1.64628	0.407	0.088	0	0	CMTM8
ESPN	0	2.92608	0.366	0.048	0	0	ESPN
HAL	0	2.07385	0.418	0.1	0	0	HAL
NADK2	0	1.94912	0.411	0.093	0	0	NADK2
MRPL34	0	0.571526	0.661	0.344	0	0	MRPL34
ALDH9A1	0	0.936343	0.524	0.207	0	0	ALDH9A1
ROMO1	0	0.733273	0.879	0.562	0	0	ROMO1
NDUFV3	0	0.755248	0.615	0.299	0	0	NDUFV3
DSP	0	1.66783	0.416	0.101	0	0	DSP
AP003716.1	0	3.47058	0.346	0.031	0	0	AP003716.1
DHTKD1	0	1.365	0.453	0.139	0	0	DHTKD1
C1orf43	0	0.614968	0.819	0.505	0	0	C1orf43
SEC61B	0	0.626218	0.912	0.599	0	0	SEC61B
COX7A2L	0	0.547235	0.668	0.355	0	0	COX7A2L
MPLKIP	0	0.724081	0.591	0.278	0	0	MPLKIP
SLC7A2	0	2.0824	0.399	0.087	0	0	SLC7A2
GGCX	0	0.896446	0.493	0.181	0	0	GGCX
SLIRP	0	0.564755	0.698	0.386	0	0	SLIRP
MRPL36	0	0.730789	0.547	0.236	0	0	MRPL36
UGDH	0	1.87975	0.418	0.107	0	0	UGDH
MRPL12	0	1.10596	0.486	0.175	0	0	MRPL12
HDGF	0	0.725474	0.57	0.259	0	0	HDGF
SAA1	0	3.17028	0.405	0.095	0	0	SAA1
NDUFAF8	0	0.733689	0.546	0.236	0	0	NDUFAF8
PAWR	0	1.48897	0.42	0.11	0	0	PAWR
MTHFS	0	1.62829	0.436	0.127	0	0	MTHFS
SLC47A1	0	2.61699	0.365	0.056	0	0	SLC47A1
ELOVL2	0	3.42456	0.346	0.037	0	0	ELOVL2
ISOC2	0	1.23892	0.471	0.162	0	0	ISOC2
IDI1	0	1.09439	0.587	0.278	0	0	IDI1
MDH2	0	0.565024	0.687	0.379	0	0	MDH2
GLUD1	0	1.07111	0.534	0.226	0	0	GLUD1
CHP1	0	0.907579	0.518	0.21	0	0	CHP1
MT1G	0	3.50529	0.472	0.164	0	0	MT1G
ECHDC3	0	2.04336	0.387	0.08	0	0	ECHDC3
HSD17B8	0	1.54582	0.419	0.112	0	0	HSD17B8
LAPTM4A	0	0.606378	0.859	0.552	0	0	LAPTM4A
WASL	0	0.98579	0.473	0.168	0	0	WASL
SLC39A5	0	3.37886	0.336	0.032	0	0	SLC39A5
CLDN7	0	1.53482	0.4	0.096	0	0	CLDN7
AKR7A3	0	2.6717	0.356	0.053	0	0	AKR7A3
ATP5PF	0	0.69817	0.922	0.62	0	0	ATP5PF
RHOBTB3	0	1.56976	0.405	0.103	0	0	RHOBTB3
IQGAP2	0	0.544194	0.711	0.409	0	0	IQGAP2
CYP4V2	0	1.73893	0.4	0.099	0	0	CYP4V2
AK3	0	1.09851	0.457	0.156	0	0	AK3
CYP4A22	0	2.75317	0.356	0.055	0	0	CYP4A22
ETNK2	0	3.01337	0.341	0.041	0	0	ETNK2
EI24	0	1.14671	0.463	0.163	0	0	EI24
CYP2D7	0	1.97426	0.39	0.091	0	0	CYP2D7
CXXC5	0	0.85708	0.486	0.187	0	0	CXXC5
PSMD4	0	0.517566	0.67	0.372	0	0	PSMD4
SLC31A1	0	1.07991	0.472	0.174	0	0	SLC31A1
LARP4	0	0.996704	0.487	0.189	0	0	LARP4
PIN4	0	0.768127	0.543	0.246	0	0	PIN4
MBNL3	0	1.44382	0.421	0.124	0	0	MBNL3
2025-03-01	0	2.37142	0.361	0.064	0	0	2025-03-01
DBI	0	0.784281	0.953	0.656	0	0	DBI
HMGCL	0	1.10389	0.46	0.164	0	0	HMGCL
PSMB7	0	0.509454	0.653	0.357	0	0	PSMB7
GALT	0	1.04938	0.448	0.152	0	0	GALT
ALDH5A1	0	2.1995	0.36	0.064	0	0	ALDH5A1
ABCC6P1	0	2.73141	0.348	0.052	0	0	ABCC6P1
ERBB3	0	1.88127	0.381	0.086	0	0	ERBB3
SLC30A10	0	2.94239	0.335	0.04	0	0	SLC30A10
DEPDC7	0	2.71317	0.348	0.053	0	0	DEPDC7
METTL7B	0	1.11082	0.419	0.124	0	0	METTL7B
EMP2	0	0.834583	0.473	0.178	0	0	EMP2
NDUFB1	0	0.598741	0.915	0.621	0	0	NDUFB1
GSTK1	0	0.888099	0.914	0.62	0	0	GSTK1
NDUFS2	0	0.547919	0.597	0.303	0	0	NDUFS2
MRPS18B	0	0.834927	0.593	0.299	0	0	MRPS18B
DNAJB9	0	0.734182	0.507	0.214	0	0	DNAJB9
HYI	0	1.12678	0.439	0.146	0	0	HYI
TLE1	0	0.845387	0.436	0.144	0	0	TLE1
COX6A1	0	0.803237	0.957	0.665	0	0	COX6A1
TIMM10	0	0.556512	0.561	0.27	0	0	TIMM10
CNPY2	0	0.856753	0.525	0.234	0	0	CNPY2
SEM1	0	0.575391	0.902	0.612	0	0	SEM1
LGALS4	0	0.939713	0.436	0.146	0	0	LGALS4
CKS1B	0	0.692125	0.489	0.199	0	0	CKS1B
MT-TL1	0	1.31564	0.473	0.184	0	0	MT-TL1
VSNL1	0	2.13396	0.354	0.066	0	0	VSNL1
ATP5MD	0	0.793447	0.946	0.658	0	0	ATP5MD
PNKD	0	0.547539	0.562	0.275	0	0	PNKD
DMGDH	0	2.49969	0.339	0.052	0	0	DMGDH
TIMM17A	0	0.659031	0.537	0.25	0	0	TIMM17A
MMAB	0	1.91673	0.39	0.103	0	0	MMAB
ABCG8	0	2.72577	0.335	0.048	0	0	ABCG8
ATP5ME	0	0.79937	0.93	0.643	0	0	ATP5ME
PFDN6	0	0.715044	0.517	0.23	0	0	PFDN6
ARSE	0	2.19014	0.348	0.061	0	0	ARSE
KLHDC2	0	0.908279	0.469	0.182	0	0	KLHDC2
UQCR11	0	0.576074	0.851	0.565	0	0	UQCR11
ONECUT2	0	1.99339	0.345	0.059	0	0	ONECUT2
ISOC1	0	1.40753	0.403	0.118	0	0	ISOC1
GCDH	0	1.77547	0.376	0.091	0	0	GCDH
KCNJ8	0	2.34958	0.338	0.053	0	0	KCNJ8
ATP5IF1	0	0.736656	0.902	0.617	0	0	ATP5IF1
MOCS2	0	0.989911	0.458	0.173	0	0	MOCS2
SIAH2	0	0.711685	0.49	0.205	0	0	SIAH2
DGAT2	0	2.00358	0.379	0.095	0	0	DGAT2
COX7B	0	0.724507	0.903	0.619	0	0	COX7B
RHOU	0	1.16261	0.422	0.138	0	0	RHOU
FDX1	0	0.705428	0.528	0.245	0	0	FDX1
RAB4A	0	0.645423	0.517	0.235	0	0	RAB4A
ONECUT1	0	2.41329	0.334	0.052	0	0	ONECUT1
ETFRF1	0	1.02259	0.447	0.165	0	0	ETFRF1
TOM1L1	0	2.12308	0.356	0.074	0	0	TOM1L1
MRPL2	0	1.04888	0.441	0.16	0	0	MRPL2
MRPS36	0	0.56046	0.587	0.306	0	0	MRPS36
CSAG1	0	2.46774	0.352	0.071	0	0	CSAG1
ITPR2	0	0.6033	0.521	0.241	0	0	ITPR2
ADK	0	0.944013	0.451	0.171	0	0	ADK
TSKU	0	3.17182	0.31	0.03	0	0	TSKU
CRLS1	0	1.32626	0.418	0.138	0	0	CRLS1
GBA3	0	2.42919	0.348	0.069	0	0	GBA3
ATP5PD	0	0.627416	0.942	0.663	0	0	ATP5PD
TMEM45B	0	2.8682	0.332	0.054	0	0	TMEM45B
SLC39A14	0	1.84534	0.356	0.078	0	0	SLC39A14
SLC51A	0	1.96539	0.349	0.071	0	0	SLC51A
NIT2	0	0.999929	0.45	0.173	0	0	NIT2
MRPL13	0	0.559885	0.528	0.251	0	0	MRPL13
MRPS33	0	0.527073	0.537	0.261	0	0	MRPS33
EPHX2	0	2.11405	0.339	0.063	0	0	EPHX2
KCTD3	0	1.55304	0.375	0.099	0	0	KCTD3
OSGIN1	0	3.09911	0.314	0.039	0	0	OSGIN1
PALMD	0	1.32617	0.362	0.088	0	0	PALMD
EVA1A	0	2.6937	0.323	0.049	0	0	EVA1A
FMC1	0	1.05908	0.424	0.15	0	0	FMC1
PKLR	0	2.91494	0.312	0.039	0	0	PKLR
SLC17A4	0	2.74898	0.311	0.038	0	0	SLC17A4
CFL2	0	0.885845	0.426	0.153	0	0	CFL2
PAICS	0	1.07012	0.418	0.146	0	0	PAICS
DGCR6L	0	0.718705	0.466	0.194	0	0	DGCR6L
PTPRF	0	2.08325	0.338	0.067	0	0	PTPRF
IL6R	0	1.24343	0.414	0.143	0	0	IL6R
NDUFA3	0	0.521905	0.891	0.62	0	0	NDUFA3
GCLM	0	1.10981	0.41	0.139	0	0	GCLM
PMVK	0	0.805071	0.471	0.2	0	0	PMVK
SLC6A1	0	2.7742	0.312	0.042	0	0	SLC6A1
RTP3	0	3.36305	0.298	0.029	0	0	RTP3
IARS2	0	0.562737	0.505	0.237	0	0	IARS2
SCARB1	0	1.21609	0.394	0.126	0	0	SCARB1
NME4	0	0.75046	0.447	0.179	0	0	NME4
ALCAM	0	0.550716	0.487	0.219	0	0	ALCAM
MIR4458HG	0	1.32749	0.406	0.138	0	0	MIR4458HG
LACTB2	0	1.33868	0.421	0.154	0	0	LACTB2
EGFR	0	1.94834	0.342	0.076	0	0	EGFR
CXADR	0	1.21969	0.372	0.106	0	0	CXADR
NNMT	0	2.26462	0.362	0.096	0	0	NNMT
MT-TW	0	1.31439	0.719	0.453	0	0	MT-TW
GHR	0	1.52278	0.354	0.089	0	0	GHR
SMIM4	0	0.84183	0.443	0.178	0	0	SMIM4
CYC1	0	0.578669	0.626	0.361	0	0	CYC1
GYS2	0	3.18097	0.297	0.032	0	0	GYS2
PLA2G2A	0	3.53252	0.314	0.05	0	0	PLA2G2A
AL355338.1	0	2.22607	0.327	0.063	0	0	AL355338.1
SNTB1	0	1.48456	0.344	0.08	0	0	SNTB1
SLC16A1	0	1.63053	0.358	0.095	0	0	SLC16A1
SMOC1	0	2.45576	0.314	0.051	0	0	SMOC1
CSRP2	0	0.576109	0.357	0.095	0	0	CSRP2
MT-ND6	0	0.888276	0.406	0.144	0	0	MT-ND6
UQCR10	0	0.534131	0.941	0.679	0	0	UQCR10
PYGL	0	0.53624	0.451	0.19	0	0	PYGL
FAM210B	0	0.870697	0.43	0.169	0	0	FAM210B
PLS3	0	0.57669	0.418	0.158	0	0	PLS3
PPP2R1B	0	1.79111	0.343	0.083	0	0	PPP2R1B
DHCR7	0	2.12679	0.323	0.063	0	0	DHCR7
GPT2	0	1.81823	0.334	0.076	0	0	GPT2
CDH2	0	1.47908	0.348	0.09	0	0	CDH2
TMEM208	0	0.532969	0.494	0.237	0	0	TMEM208
SLC30A1	0	1.88648	0.374	0.117	0	0	SLC30A1
FAHD1	0	1.07765	0.403	0.146	0	0	FAHD1
POLDIP2	0	0.891322	0.425	0.169	0	0	POLDIP2
CPQ	0	0.571583	0.465	0.209	0	0	CPQ
MPDZ	0	1.4021	0.348	0.092	0	0	MPDZ
GPAM	0	2.28017	0.311	0.055	0	0	GPAM
PEPD	0	0.72284	0.511	0.255	0	0	PEPD
CPN2	0	2.91826	0.293	0.037	0	0	CPN2
LINC02428	0	3.45846	0.286	0.03	0	0	LINC02428
ADHFE1	0	1.75007	0.321	0.066	0	0	ADHFE1
C9orf3	0	1.26161	0.362	0.107	0	0	C9orf3
ACBD5	0	0.798939	0.427	0.173	0	0	ACBD5
ASL	0	1.19373	0.368	0.114	0	0	ASL
NIT1	0	1.10312	0.387	0.133	0	0	NIT1
TMEM120A	0	0.771725	0.431	0.177	0	0	TMEM120A
AC008760.2	0	2.17781	0.324	0.07	0	0	AC008760.2
LEPR	0	1.78277	0.346	0.093	0	0	LEPR
TMEM256	0	0.688273	0.456	0.203	0	0	TMEM256
PPARGC1A	0	2.48014	0.3	0.048	0	0	PPARGC1A
CDKN2A	0	0.65423	0.395	0.144	0	0	CDKN2A
SURF1	0	0.627317	0.471	0.22	0	0	SURF1
BORCS7	0	0.607455	0.489	0.238	0	0	BORCS7
FAM114A1	0	1.09363	0.374	0.123	0	0	FAM114A1
AC004862.1	0	3.0785	0.288	0.037	0	0	AC004862.1
LINC01485	0	2.51504	0.305	0.054	0	0	LINC01485
DNAJC25	0	1.56421	0.334	0.084	0	0	DNAJC25
EHBP1	0	1.03589	0.382	0.132	0	0	EHBP1
RALGPS2	0	0.896662	0.354	0.104	0	0	RALGPS2
RAB17	0	2.11091	0.312	0.062	0	0	RAB17
PEMT	0	1.25679	0.373	0.123	0	0	PEMT
HSD17B2	0	1.60838	0.336	0.087	0	0	HSD17B2
RABEPK	0	1.64769	0.321	0.072	0	0	RABEPK
BOLA3	0	0.65775	0.439	0.19	0	0	BOLA3
HIST1H2BK	0	1.2784	0.341	0.093	0	0	HIST1H2BK
COX5B	0	0.683981	0.969	0.721	0	0	COX5B
RDH11	0	0.706787	0.469	0.221	0	0	RDH11
SIK2	0	1.37834	0.339	0.093	0	0	SIK2
CGNL1	0	2.18217	0.3	0.054	0	0	CGNL1
IRS1	0	2.25707	0.294	0.048	0	0	IRS1
TMPRSS6	0	2.77437	0.283	0.038	0	0	TMPRSS6
SLC25A10	0	2.28084	0.296	0.052	0	0	SLC25A10
C19orf66	0	0.625827	0.404	0.161	0	0	C19orf66
HNF4A	0	2.34947	0.294	0.051	0	0	HNF4A
RORC	0	2.42548	0.284	0.041	0	0	RORC
NUCKS1	0	0.590605	0.975	0.733	0	0	NUCKS1
FAM8A1	0	1.37696	0.345	0.103	0	0	FAM8A1
COPRS	0	0.751435	0.43	0.188	0	0	COPRS
GSTA2	0	2.54961	0.288	0.046	0	0	GSTA2
MALSU1	0	0.762385	0.409	0.167	0	0	MALSU1
ACAT2	0	0.983084	0.401	0.16	0	0	ACAT2
HABP2	0	1.56875	0.34	0.099	0	0	HABP2
GCAT	0	2.53436	0.283	0.042	0	0	GCAT
MRPS35	0	0.644647	0.429	0.189	0	0	MRPS35
HLF	0	2.19997	0.294	0.054	0	0	HLF
PANK1	0	2.793	0.273	0.034	0	0	PANK1
SIL1	0	0.670321	0.426	0.187	0	0	SIL1
GSTA4	0	1.94632	0.295	0.056	0	0	GSTA4
AHCY	0	1.01864	0.387	0.149	0	0	AHCY
GRTP1	0	2.75209	0.277	0.039	0	0	GRTP1
CISD1	0	0.653523	0.419	0.181	0	0	CISD1
NDUFA1	0	0.75722	0.936	0.699	0	0	NDUFA1
GPLD1	0	2.73485	0.275	0.038	0	0	GPLD1
AGMAT	0	2.50871	0.283	0.046	0	0	AGMAT
SMARCA1	0	1.29159	0.337	0.101	0	0	SMARCA1
GCLC	0	1.14253	0.362	0.126	0	0	GCLC
SLC43A1	0	1.65698	0.314	0.078	0	0	SLC43A1
SLC22A9	0	2.43227	0.284	0.048	0	0	SLC22A9
TRIM24	0	0.769472	0.4	0.165	0	0	TRIM24
CEBPG	0	0.623062	0.428	0.193	0	0	CEBPG
HINT1	0	0.793351	0.975	0.74	0	0	HINT1
HAO2	0	2.97155	0.273	0.039	0	0	HAO2
CREB3L3	0	2.45135	0.283	0.049	0	0	CREB3L3
FERMT2	0	0.622242	0.357	0.123	0	0	FERMT2
MRPS12	0	0.609587	0.424	0.19	0	0	MRPS12
TDO2	0	1.25864	0.339	0.106	0	0	TDO2
SYBU	0	2.77094	0.263	0.03	0	0	SYBU
ACSM3	0	1.47339	0.293	0.06	0	0	ACSM3
TOLLIP	0	0.692004	0.392	0.162	0	0	TOLLIP
GPT	0	2.94134	0.26	0.03	0	0	GPT
HAMP	0	3.0241	0.31	0.08	0	0	HAMP
PPARA	0	1.37947	0.315	0.085	0	0	PPARA
CYP3A7	0	3.08885	0.277	0.048	0	0	CYP3A7
SLC1A2	0	2.357	0.256	0.027	0	0	SLC1A2
ABHD14B	0	0.671847	0.374	0.145	0	0	ABHD14B
ATF7IP2	0	0.974567	0.351	0.122	0	0	ATF7IP2
PCCA	0	1.43892	0.317	0.089	0	0	PCCA
SCML1	0	0.961705	0.346	0.119	0	0	SCML1
PRPSAP1	0	0.896102	0.366	0.139	0	0	PRPSAP1
TBX3	0	2.66625	0.251	0.025	0	0	TBX3
F11R	0	1.15621	0.377	0.151	0	0	F11R
POLD2	0	0.908217	0.36	0.134	0	0	POLD2
KANK1	0	1.99137	0.278	0.053	0	0	KANK1
SFXN1	0	0.945945	0.329	0.104	0	0	SFXN1
DIO1	0	2.89286	0.257	0.033	0	0	DIO1
CSAD	0	1.46545	0.288	0.064	0	0	CSAD
TMEM192	0	1.06849	0.334	0.111	0	0	TMEM192
ASIP	0	3.14182	0.253	0.03	0	0	ASIP
AL590094.1	0	2.96267	0.251	0.028	0	0	AL590094.1
SAA4	0	2.57522	0.275	0.053	0	0	SAA4
CYP4F2	0	2.13136	0.279	0.057	0	0	CYP4F2
ECM2	0	1.75801	0.283	0.061	0	0	ECM2
TPMT	0	0.616138	0.412	0.19	0	0	TPMT
GNAI1	0	1.40214	0.293	0.072	0	0	GNAI1
DCAF6	0	0.862822	0.36	0.139	0	0	DCAF6
CLYBL	0	1.92682	0.277	0.057	0	0	CLYBL
ZNF593	0	0.605101	0.393	0.173	0	0	ZNF593
AAMDC	0	0.818309	0.359	0.139	0	0	AAMDC
TIMM8A	0	1.75868	0.285	0.065	0	0	TIMM8A
ACSM5	0	1.53596	0.3	0.08	0	0	ACSM5
GOLIM4	0	0.55623	0.449	0.23	0	0	GOLIM4
AC021074.3	0	3.02081	0.25	0.031	0	0	AC021074.3
LSR	0	0.571589	0.35	0.131	0	0	LSR
MT1A	0	2.99019	0.303	0.084	0	0	MT1A
IMPAD1	0	1.06806	0.34	0.122	0	0	IMPAD1
NTPCR	0	0.843079	0.352	0.134	0	0	NTPCR
NFIC	0	0.529562	0.412	0.194	0	0	NFIC
UQCC3	0	0.641026	0.378	0.161	0	0	UQCC3
MT-ATP8	0	0.941016	0.954	0.737	0	0	MT-ATP8
MRPL15	0	0.703446	0.374	0.158	0	0	MRPL15
PLOD2	0	1.03191	0.314	0.098	0	0	PLOD2
COX6C	0	1.15562	0.976	0.76	0	0	COX6C
NR2F6	0	1.96429	0.266	0.051	0	0	NR2F6
CYP4F11	0	2.08681	0.273	0.058	0	0	CYP4F11
HIBCH	0	0.841033	0.327	0.112	0	0	HIBCH
PEX19	0	1.25148	0.313	0.098	0	0	PEX19
DEXI	0	1.23501	0.299	0.084	0	0	DEXI
MARVELD2	0	1.78629	0.277	0.064	0	0	MARVELD2
AIFM1	0	0.916767	0.342	0.129	0	0	AIFM1
KLF15	0	2.241	0.257	0.044	0	0	KLF15
PPIC	0	1.14805	0.302	0.089	0	0	PPIC
ACSL5	0	0.863913	0.348	0.135	0	0	ACSL5
HOMER2	0	1.81197	0.259	0.047	0	0	HOMER2
ARL4D	0	1.22767	0.325	0.113	0	0	ARL4D
AC068631.1	0	2.51956	0.252	0.04	0	0	AC068631.1
TRIAP1	0	0.672238	0.351	0.141	0	0	TRIAP1
C1RL	0	1.41215	0.289	0.079	0	0	C1RL
PPP2R5A	0	0.518137	0.388	0.179	0	0	PPP2R5A
PTS	0	0.691655	0.37	0.161	0	0	PTS
LHPP	0	0.816645	0.333	0.125	0	0	LHPP
OCEL1	0	1.30196	0.287	0.079	0	0	OCEL1
NAPRT	0	0.773346	0.344	0.136	0	0	NAPRT
DEFB1	0	1.30633	0.312	0.105	0	0	DEFB1
AC104461.1	0	1.68921	0.276	0.069	0	0	AC104461.1
SDSL	0	1.49551	0.302	0.095	0	0	SDSL
ALG3	0	0.687196	0.364	0.157	0	0	ALG3
GRB14	0	1.749	0.268	0.062	0	0	GRB14
NR5A2	0	1.27506	0.267	0.061	0	0	NR5A2
TMEM9	0	0.720741	0.356	0.15	0	0	TMEM9
C6orf106	0	0.775933	0.345	0.139	0	0	C6orf106
IGSF8	0	1.24894	0.289	0.086	0	0	IGSF8
NDRG2	0	0.576866	0.379	0.177	0	0	NDRG2
FRA10AC1	0	0.629776	0.365	0.163	0	0	FRA10AC1
GLS2	0	1.88082	0.264	0.063	0	0	GLS2
EPB41L5	0	1.88446	0.255	0.055	0	0	EPB41L5
MME	0	1.81627	0.25	0.05	0	0	MME
HMGB3	0	0.802558	0.347	0.147	0	0	HMGB3
ATPAF1	0	0.610205	0.346	0.146	0	0	ATPAF1
DDAH1	0	1.31662	0.289	0.089	0	0	DDAH1
TMEM245	0	0.639867	0.343	0.144	0	0	TMEM245
ABCB1	0	0.814973	0.305	0.106	0	0	ABCB1
TMEM38B	0	0.935078	0.302	0.103	0	0	TMEM38B
LMO7	0	1.5952	0.257	0.059	0	0	LMO7
NDFIP2	0	1.1038	0.289	0.091	0	0	NDFIP2
HYAL1	0	1.54967	0.254	0.057	0	0	HYAL1
MCEE	0	0.835065	0.322	0.125	0	0	MCEE
SLC25A33	0	1.45868	0.273	0.076	0	0	SLC25A33
IMMP2L	0	1.42543	0.258	0.061	0	0	IMMP2L
CYP2C18	0	0.983283	0.29	0.093	0	0	CYP2C18
TEX30	0	1.21802	0.284	0.087	0	0	TEX30
NDUFA4	0	0.831847	0.983	0.786	0	0	NDUFA4
FMO4	0	1.57834	0.267	0.071	0	0	FMO4
RBKS	0	1.50433	0.262	0.066	0	0	RBKS
HACD2	0	0.638984	0.362	0.166	0	0	HACD2
TMBIM6	0	0.638531	0.981	0.785	0	0	TMBIM6
SPR	0	1.57812	0.264	0.069	0	0	SPR
BAD	0	0.520114	0.378	0.184	0	0	BAD
MTFR1	0	1.65604	0.25	0.056	0	0	MTFR1
CCDC170	0	1.49362	0.268	0.074	0	0	CCDC170
MRPL58	0	0.673715	0.331	0.137	0	0	MRPL58
PSAT1	0	1.69069	0.263	0.07	0	0	PSAT1
GNPNAT1	0	1.25163	0.276	0.085	0	0	GNPNAT1
TMX2	0	0.591385	0.352	0.161	0	0	TMX2
SHMT2	0	0.59184	0.343	0.153	0	0	SHMT2
RAI14	0	1.33878	0.259	0.07	0	0	RAI14
ISCA1	0	0.635324	0.318	0.129	0	0	ISCA1
C11orf71	0	0.807694	0.303	0.114	0	0	C11orf71
CRADD	0	0.87921	0.286	0.097	0	0	CRADD
TTC38	0	1.00968	0.271	0.085	0	0	TTC38
PMPCA	0	0.768057	0.295	0.109	0	0	PMPCA
MACO1	0	0.682204	0.314	0.128	0	0	MACO1
MAPK6	0	0.535951	0.339	0.154	0	0	MAPK6
SWI5	0	0.95656	0.275	0.09	0	0	SWI5
TJP1	0	0.688301	0.297	0.112	0	0	TJP1
CLDN3	0	1.25153	0.25	0.065	0	0	CLDN3
GSTM4	0	0.93739	0.29	0.105	0	0	GSTM4
TMEM220	0	1.14151	0.283	0.098	0	0	TMEM220
NR0B2	0	1.6128	0.267	0.083	0	0	NR0B2
DCAF11	0	0.707537	0.307	0.124	0	0	DCAF11
FAM45A	0	0.783772	0.307	0.124	0	0	FAM45A
AGPAT2	0	0.746939	0.311	0.128	0	0	AGPAT2
LGR4	0	1.41934	0.259	0.076	0	0	LGR4
CRAT	0	1.29302	0.259	0.077	0	0	CRAT
AP1S1	0	0.711722	0.314	0.132	0	0	AP1S1
GMNN	0	0.59115	0.319	0.137	0	0	GMNN
ETFDH	0	1.03987	0.257	0.075	0	0	ETFDH
LYPLAL1	0	0.54286	0.328	0.147	0	0	LYPLAL1
TMEM41B	0	0.659584	0.305	0.124	0	0	TMEM41B
PDE4DIP	0	0.774952	0.298	0.117	0	0	PDE4DIP
ENDOG	0	1.21409	0.254	0.074	0	0	ENDOG
AIMP2	0	0.691027	0.308	0.129	0	0	AIMP2
SH3D19	0	1.345	0.251	0.072	0	0	SH3D19
SCRN2	0	0.538755	0.319	0.14	0	0	SCRN2
ZHX1	0	0.607945	0.299	0.12	0	0	ZHX1
CTSF	0	0.805358	0.296	0.117	0	0	CTSF
GLRX2	0	0.624686	0.297	0.121	0	0	GLRX2
LARP1B	0	0.723642	0.292	0.116	0	0	LARP1B
ABCA5	0	1.01284	0.257	0.081	0	0	ABCA5
APOOL	0	1.27066	0.252	0.076	0	0	APOOL
HHEX	0	0.594239	0.308	0.134	0	0	HHEX
ADIPOR2	0	0.554553	0.314	0.141	0	0	ADIPOR2
MRPL19	0	0.510814	0.314	0.141	0	0	MRPL19
ABCD3	0	1.13033	0.254	0.081	0	0	ABCD3
HSD17B7	0	0.985027	0.256	0.083	0	0	HSD17B7
RMDN1	0	0.527706	0.315	0.143	0	0	RMDN1
NOP16	0	0.619232	0.287	0.115	0	0	NOP16
CETN2	0	0.670601	0.309	0.137	0	0	CETN2
HSBP1L1	0	0.699573	0.294	0.122	0	0	HSBP1L1
TRUB2	0	0.873149	0.269	0.098	0	0	TRUB2
AC027644.3	0	0.775436	0.265	0.094	0	0	AC027644.3
INSIG2	0	0.678947	0.304	0.133	0	0	INSIG2
IDNK	0	1.0342	0.251	0.08	0	0	IDNK
GPRC5C	0	0.722214	0.271	0.102	0	0	GPRC5C
QTRT1	0	0.765773	0.271	0.102	0	0	QTRT1
MCCC2	0	0.834793	0.268	0.099	0	0	MCCC2
GLT8D1	0	0.770374	0.279	0.112	0	0	GLT8D1
TCAIM	0	0.840438	0.261	0.094	0	0	TCAIM
VKORC1L1	0	0.984702	0.257	0.09	0	0	VKORC1L1
MRPL46	0	0.930702	0.259	0.092	0	0	MRPL46
C11orf1	0	0.831877	0.27	0.104	0	0	C11orf1
LYRM1	0	0.802462	0.256	0.091	0	0	LYRM1
PDIA5	0	0.716557	0.26	0.097	0	0	PDIA5
SLC35A3	0	0.605038	0.285	0.122	0	0	SLC35A3
PSMG4	0	0.744397	0.262	0.1	0	0	PSMG4
C19orf12	0	0.703378	0.253	0.092	0	0	C19orf12
HSCB	0	0.686837	0.283	0.123	0	0	HSCB
CDC37L1	0	0.736824	0.251	0.092	0	0	CDC37L1
ENOSF1	0	0.754239	0.261	0.103	0	0	ENOSF1
FAHD2A	0	0.775585	0.264	0.109	0	0	FAHD2A
DDI2	0	0.709245	0.258	0.103	0	0	DDI2
LINC01287	0	0.61062	0.252	0.099	0	0	LINC01287
CYHR1	0	0.532021	0.251	0.101	0	0	CYHR1
NREP	0	0.849717	0.25	0.101	0	0	NREP
MT1F	0	3.07063	0.269	0.13	0	0	MT1F
MT-ND4L	0	1.36276	0.995	0.928	0	0	MT-ND4L
MTATP6P1	0	0.554419	0.994	0.936	0	0	MTATP6P1
MT-ND3	0	1.29306	0.996	0.978	0	0	MT-ND3
MT-ND1	0	1.14347	0.997	0.986	0	0	MT-ND1
MT-ND2	0	1.3254	0.997	0.991	0	0	MT-ND2
MT-ND5	0	1.42394	0.997	0.992	0	0	MT-ND5
MT-CYB	0	1.54114	0.999	0.995	0	0	MT-CYB
MT-CO2	0	1.20167	0.998	0.996	0	0	MT-CO2
MT-ATP6	0	0.958119	0.998	0.997	0	0	MT-ATP6
MT-CO1	0	0.913061	0.999	0.999	0	0	MT-CO1
MT-ND4	0	1.27902	0.999	0.999	0	0	MT-ND4
MT-CO3	0	1.14793	0.999	0.999	0	0	MT-CO3
MRPS18A	7.97e-308	0.513833	0.336	0.156	2.43e-303	0	MRPS18A
ODR4	1.1e-307	0.587266	0.299	0.133	3.34e-303	0	ODR4
TFRC	1.58e-307	0.534966	0.29	0.127	4.83e-303	0	TFRC
CCNB1IP1	9.3e-307	0.669485	0.282	0.123	2.84e-302	0	CCNB1IP1
MT2A	7.83e-305	2.33339	0.781	0.607	2.39e-300	0	MT2A
SLC29A1	3.44e-302	0.771415	0.274	0.12	1.05e-297	0	SLC29A1
ZCCHC9	2.1e-301	0.60193	0.28	0.122	6.39e-297	0	ZCCHC9
JAGN1	2.38e-297	0.504482	0.308	0.139	7.26e-293	0	JAGN1
RXRA	8.29e-297	0.57427	0.268	0.115	2.53e-292	0	RXRA
ORMDL3	1.46e-292	0.516687	0.275	0.12	4.44e-288	0	ORMDL3
ALG8	1.71e-288	0.595308	0.276	0.122	5.22e-284	0	ALG8
DHRS4L2	1.24e-287	0.593929	0.266	0.115	3.79e-283	0	DHRS4L2
POP7	3.32e-277	0.527116	0.316	0.149	1.01e-272	0	POP7
RPP25L	3.47e-272	0.508113	0.285	0.13	1.06e-267	0	RPP25L
MRPS2	3.58e-265	0.508456	0.254	0.112	1.09e-260	0	MRPS2
P4HA1	3.94e-265	0.599617	0.315	0.153	1.2e-260	0	P4HA1
FURIN	2.65e-261	0.651213	0.254	0.114	8.09e-257	0	FURIN
FADS1	1.96e-260	0.645408	0.272	0.125	5.98e-256	0	FADS1
GLUL	4.2e-252	1.47297	0.752	0.541	1.28e-247	0	GLUL
MT-TV	6.99e-235	0.565097	0.303	0.152	2.13e-230	0	MT-TV
ATF5	2.35e-213	0.743178	0.251	0.122	7.18e-209	0	ATF5
OAT	3e-191	0.783113	0.306	0.172	9.14e-187	0	OAT
TRBC2	0	3.80091	0.845	0.173	0	1	TRBC2
KLRB1	0	4.36724	0.788	0.133	0	1	KLRB1
GZMA	0	3.99367	0.757	0.11	0	1	GZMA
CD69	0	4.1934	0.88	0.24	0	1	CD69
CST7	0	3.79294	0.824	0.187	0	1	CST7
NKG7	0	4.2599	0.853	0.22	0	1	NKG7
CCL5	0	4.38748	0.909	0.313	0	1	CCL5
ETS1	0	3.11664	0.784	0.19	0	1	ETS1
CD96	0	4.17557	0.676	0.087	0	1	CD96
CD7	0	4.40724	0.664	0.085	0	1	CD7
CD3E	0	3.96514	0.648	0.089	0	1	CD3E
CD2	0	3.88268	0.64	0.097	0	1	CD2
KLRD1	0	4.38755	0.594	0.083	0	1	KLRD1
TRAC	0	3.82538	0.59	0.094	0	1	TRAC
PYHIN1	0	4.04393	0.568	0.077	0	1	PYHIN1
CD3D	0	3.7589	0.598	0.11	0	1	CD3D
TRBC1	0	3.88942	0.593	0.108	0	1	TRBC1
GZMK	0	4.43818	0.551	0.067	0	1	GZMK
HCST	0	2.29511	0.849	0.4	0	1	HCST
CTSW	0	4.07806	0.507	0.07	0	1	CTSW
IL2RG	0	2.56354	0.73	0.295	0	1	IL2RG
DUSP2	0	2.99895	0.667	0.238	0	1	DUSP2
PTPRC	0	1.84712	0.939	0.51	0	1	PTPRC
IL7R	0	3.87311	0.541	0.113	0	1	IL7R
GZMM	0	4.36794	0.48	0.052	0	1	GZMM
SH2D1A	0	4.06757	0.478	0.052	0	1	SH2D1A
IL32	0	2.78929	0.744	0.328	0	1	IL32
ALOX5AP	0	2.19546	0.62	0.208	0	1	ALOX5AP
CYTIP	0	2.4339	0.715	0.306	0	1	CYTIP
LINC01871	0	4.06598	0.473	0.07	0	1	LINC01871
RAC2	0	2.17817	0.708	0.311	0	1	RAC2
GIMAP7	0	2.23822	0.655	0.261	0	1	GIMAP7
PCED1B-AS1	0	3.00867	0.556	0.164	0	1	PCED1B-AS1
XCL2	0	4.8304	0.439	0.048	0	1	XCL2
PRF1	0	4.06696	0.437	0.056	0	1	PRF1
GBP5	0	2.69795	0.543	0.164	0	1	GBP5
CD247	0	4.15302	0.429	0.051	0	1	CD247
CD160	0	4.81658	0.404	0.033	0	1	CD160
ACAP1	0	3.01901	0.484	0.114	0	1	ACAP1
IFNG	0	4.9882	0.442	0.075	0	1	IFNG
IKZF3	0	3.49014	0.439	0.073	0	1	IKZF3
LCP1	0	1.31204	0.879	0.515	0	1	LCP1
STK17A	0	2.93476	0.53	0.167	0	1	STK17A
RARRES3	0	2.70361	0.73	0.368	0	1	RARRES3
CD3G	0	3.78748	0.413	0.054	0	1	CD3G
LBH	0	2.60435	0.468	0.114	0	1	LBH
XCL1	0	4.97081	0.397	0.047	0	1	XCL1
SKAP1	0	3.73528	0.387	0.057	0	1	SKAP1
CCL4	0	2.61767	0.896	0.571	0	1	CCL4
FYB1	0	1.37893	0.708	0.383	0	1	FYB1
TRDC	0	4.16941	0.362	0.043	0	1	TRDC
AC243960.1	0	3.08406	0.407	0.091	0	1	AC243960.1
S100A4	0	1.31907	0.804	0.49	0	1	S100A4
ITM2A	0	2.92059	0.415	0.105	0	1	ITM2A
LCK	0	3.71172	0.355	0.047	0	1	LCK
CD52	0	1.90333	0.769	0.462	0	1	CD52
WIPF1	0	2.06315	0.614	0.311	0	1	WIPF1
GZMH	0	4.06692	0.357	0.055	0	1	GZMH
PARP8	0	2.94568	0.421	0.123	0	1	PARP8
EVL	0	2.34468	0.533	0.237	0	1	EVL
ARHGDIB	0	1.12053	0.887	0.592	0	1	ARHGDIB
CD48	0	1.90127	0.573	0.282	0	1	CD48
SYTL3	0	3.39855	0.357	0.066	0	1	SYTL3
MYBL1	0	4.01594	0.336	0.046	0	1	MYBL1
FCRL6	0	4.46678	0.324	0.035	0	1	FCRL6
SRGN	0	0.935424	0.978	0.691	0	1	SRGN
KLRF1	0	4.35449	0.323	0.036	0	1	KLRF1
SH2D2A	0	3.97667	0.327	0.041	0	1	SH2D2A
FYN	0	2.67222	0.451	0.168	0	1	FYN
TIGIT	0	4.15987	0.319	0.038	0	1	TIGIT
TRGC2	0	4.27664	0.312	0.031	0	1	TRGC2
RBL2	0	2.52318	0.553	0.276	0	1	RBL2
GPR171	0	3.68372	0.325	0.048	0	1	GPR171
LTB	0	2.66438	0.398	0.124	0	1	LTB
PRDM1	0	2.29052	0.432	0.167	0	1	PRDM1
CD8A	0	4.02475	0.3	0.036	0	1	CD8A
CLEC2D	0	2.94157	0.348	0.086	0	1	CLEC2D
IL2RB	0	4.4081	0.292	0.03	0	1	IL2RB
SH3KBP1	0	1.85799	0.584	0.322	0	1	SH3KBP1
FCMR	0	2.5993	0.346	0.089	0	1	FCMR
CMC1	0	3.30008	0.593	0.336	0	1	CMC1
RORA	0	2.95968	0.395	0.139	0	1	RORA
CXCR6	0	4.52319	0.283	0.027	0	1	CXCR6
PLAC8	0	1.73433	0.484	0.23	0	1	PLAC8
PRKCH	0	2.96754	0.33	0.079	0	1	PRKCH
RHOH	0	2.89987	0.326	0.076	0	1	RHOH
CNOT6L	0	2.45576	0.446	0.198	0	1	CNOT6L
CD53	0	1.33386	0.656	0.409	0	1	CD53
HOPX	0	3.72272	0.293	0.049	0	1	HOPX
BIN2	0	2.11142	0.433	0.191	0	1	BIN2
PIP4K2A	0	2.26372	0.425	0.185	0	1	PIP4K2A
PTPN22	0	2.95471	0.322	0.083	0	1	PTPN22
EMB	0	2.24791	0.382	0.147	0	1	EMB
SLFN5	0	2.52859	0.351	0.118	0	1	SLFN5
SPOCK2	0	3.49175	0.275	0.044	0	1	SPOCK2
RGS1	0	1.69658	0.767	0.538	0	1	RGS1
GZMB	0	3.44611	0.292	0.063	0	1	GZMB
TC2N	0	3.46918	0.28	0.052	0	1	TC2N
STAT4	0	3.6537	0.27	0.042	0	1	STAT4
TRAT1	0	3.98552	0.257	0.029	0	1	TRAT1
SAMD3	0	4.29786	0.252	0.025	0	1	SAMD3
EOMES	0	4.11652	0.252	0.026	0	1	EOMES
ISG20	0	1.66819	0.485	0.259	0	1	ISG20
TRAF3IP3	0	2.51648	0.332	0.108	0	1	TRAF3IP3
2025-09-01	0	2.64103	0.334	0.11	0	1	2025-09-01
LINC00861	0	3.88247	0.257	0.033	0	1	LINC00861
STK17B	0	1.49709	0.525	0.303	0	1	STK17B
SLC38A1	0	2.41045	0.36	0.14	0	1	SLC38A1
GPR65	0	2.27494	0.379	0.16	0	1	GPR65
ELF1	0	1.7066	0.635	0.418	0	1	ELF1
IPCEF1	0	3.34125	0.272	0.056	0	1	IPCEF1
CCL4L2	0	2.10529	0.751	0.538	0	1	CCL4L2
RUNX3	0	2.71654	0.296	0.084	0	1	RUNX3
TXNIP	0	2.03975	0.912	0.701	0	1	TXNIP
DENND2D	0	3.03912	0.293	0.082	0	1	DENND2D
GNLY	0	3.97134	0.32	0.11	0	1	GNLY
TSC22D3	0	1.35653	0.786	0.577	0	1	TSC22D3
PIK3R1	0	2.40589	0.553	0.347	0	1	PIK3R1
CXCR4	0	1.25391	0.654	0.448	0	1	CXCR4
BTG1	0	2.34456	0.984	0.778	0	1	BTG1
TAGAP	0	2.32381	0.341	0.136	0	1	TAGAP
CLEC2B	0	1.58092	0.573	0.368	0	1	CLEC2B
ARHGAP15	0	1.96238	0.396	0.198	0	1	ARHGAP15
PIK3IP1	0	2.3573	0.318	0.124	0	1	PIK3IP1
CCND2	0	2.535	0.28	0.087	0	1	CCND2
PDCD4	0	1.89241	0.48	0.291	0	1	PDCD4
TNFAIP3	0	1.62288	0.469	0.281	0	1	TNFAIP3
CORO1A	0	1.53647	0.396	0.21	0	1	CORO1A
SYNE2	0	1.66836	0.438	0.252	0	1	SYNE2
GIMAP4	0	1.50837	0.485	0.299	0	1	GIMAP4
SLA	0	1.48691	0.437	0.251	0	1	SLA
SOCS1	0	2.41322	0.3	0.117	0	1	SOCS1
GNG2	0	2.12747	0.329	0.147	0	1	GNG2
OXNAD1	0	3.03263	0.276	0.098	0	1	OXNAD1
KIAA1551	0	1.70388	0.458	0.282	0	1	KIAA1551
HSPA6	0	2.57191	0.385	0.209	0	1	HSPA6
ITGAL	0	2.2599	0.311	0.135	0	1	ITGAL
PNRC1	0	1.56239	0.878	0.703	0	1	PNRC1
STK4	0	1.72242	0.442	0.268	0	1	STK4
CDC42SE2	0	1.90658	0.415	0.241	0	1	CDC42SE2
ZFP36L2	0	1.48134	0.7	0.526	0	1	ZFP36L2
IRF1	0	1.98271	0.46	0.287	0	1	IRF1
TSPYL2	0	2.19754	0.324	0.154	0	1	TSPYL2
ARAP2	0	2.3918	0.276	0.107	0	1	ARAP2
LYAR	0	2.65773	0.306	0.144	0	1	LYAR
BTN3A2	0	1.99604	0.364	0.203	0	1	BTN3A2
DNAJB4	0	2.57257	0.453	0.293	0	1	DNAJB4
APOBEC3G	0	2.2196	0.27	0.115	0	1	APOBEC3G
LEPROTL1	0	1.97596	0.446	0.293	0	1	LEPROTL1
PPP1R15A	0	1.86093	0.602	0.449	0	1	PPP1R15A
YWHAZ	0	1.38949	0.78	0.63	0	1	YWHAZ
BTG2	0	2.19595	0.503	0.356	0	1	BTG2
MBNL1	0	1.44437	0.637	0.491	0	1	MBNL1
DNAJB1	0	2.23056	0.828	0.682	0	1	DNAJB1
HLA-F	0	1.37522	0.598	0.457	0	1	HLA-F
HSPA1B	0	1.5423	0.843	0.709	0	1	HSPA1B
HLA-E	0	0.705517	0.955	0.821	0	1	HLA-E
ID2	0	1.47575	0.853	0.741	0	1	ID2
RSRP1	0	1.459	0.578	0.468	0	1	RSRP1
SH3BGRL3	0	0.758637	0.889	0.78	0	1	SH3BGRL3
JAK1	0	1.28147	0.673	0.566	0	1	JAK1
IFITM2	0	1.35335	0.918	0.816	0	1	IFITM2
2025-09-07	0	1.29821	0.704	0.604	0	1	2025-09-07
CALM1	0	1.26383	0.881	0.782	0	1	CALM1
HSPA8	0	1.98042	0.848	0.751	0	1	HSPA8
HLA-A	0	0.957576	0.958	0.862	0	1	HLA-A
JUNB	0	1.25313	0.726	0.635	0	1	JUNB
RPS15A	0	1.25329	0.921	0.84	0	1	RPS15A
RPSA	0	1.19311	0.817	0.742	0	1	RPSA
TMSB4X	0	0.71557	1	0.928	0	1	TMSB4X
HLA-C	0	0.792505	0.973	0.908	0	1	HLA-C
DDX5	0	1.10663	0.936	0.874	0	1	DDX5
PFN1	0	1.18414	0.989	0.932	0	1	PFN1
RPL26	0	0.933129	0.821	0.769	0	1	RPL26
EIF4A2	0	1.26657	0.783	0.732	0	1	EIF4A2
RPL39	0	1.01736	0.968	0.918	0	1	RPL39
HLA-B	0	0.707908	0.988	0.939	0	1	HLA-B
RPL41	0	1.14223	0.953	0.904	0	1	RPL41
HNRNPDL	0	1.06829	0.69	0.646	0	1	HNRNPDL
PABPC1	0	0.624161	0.982	0.945	0	1	PABPC1
RPS3	0	1.35232	0.991	0.954	0	1	RPS3
JUN	0	1.60747	0.832	0.795	0	1	JUN
RPS27A	0	1.24857	0.99	0.955	0	1	RPS27A
RPL21	0	1.19138	0.998	0.964	0	1	RPL21
RPL23A	0	1.10751	0.994	0.96	0	1	RPL23A
RPS28	0	0.91832	0.965	0.933	0	1	RPS28
RPS3A	0	0.723816	0.977	0.946	0	1	RPS3A
RPS14	0	0.757127	0.988	0.958	0	1	RPS14
RPL18A	0	0.752271	0.974	0.945	0	1	RPL18A
RPS21	0	1.01851	0.96	0.931	0	1	RPS21
RPS2	0	0.842039	0.993	0.965	0	1	RPS2
HSPA1A	0	1.44135	0.881	0.853	0	1	HSPA1A
RPS12	0	1.24399	0.961	0.934	0	1	RPS12
RBM39	0	1.13317	0.795	0.769	0	1	RBM39
RPL30	0	0.979194	0.985	0.959	0	1	RPL30
RPL27	0	0.90903	0.947	0.921	0	1	RPL27
RPL14	0	0.858108	0.966	0.941	0	1	RPL14
H3F3B	0	1.07571	0.915	0.94	0	1	H3F3B
RPS15	0	0.847617	0.98	0.956	0	1	RPS15
RPL18	0	0.842699	0.965	0.942	0	1	RPL18
RPL35A	0	0.811089	0.967	0.944	0	1	RPL35A
RPL13A	0	1.08275	0.995	0.973	0	1	RPL13A
RPL10	0	0.808904	0.979	0.957	0	1	RPL10
RPL15	0	0.738759	0.991	0.969	0	1	RPL15
RPS20	0	0.863002	0.961	0.94	0	1	RPS20
RPL28	0	1.0544	0.944	0.923	0	1	RPL28
RPL13	0	1.10464	0.998	0.978	0	1	RPL13
RPL12	0	0.752654	0.941	0.922	0	1	RPL12
RPLP2	0	1.26786	0.999	0.981	0	1	RPLP2
RPS23	0	0.696148	0.969	0.951	0	1	RPS23
RPL3	0	0.819157	0.957	0.94	0	1	RPL3
RPL27A	0	0.966282	0.995	0.978	0	1	RPL27A
RPS29	0	1.4615	0.999	0.982	0	1	RPS29
RPS16	0	0.864516	0.974	0.958	0	1	RPS16
RPS19	0	1.09224	0.995	0.979	0	1	RPS19
FAU	0	0.711023	0.96	0.945	0	1	FAU
RPL9	0	0.885672	0.961	0.946	0	1	RPL9
RPS18	0	0.568796	0.99	0.975	0	1	RPS18
RPS13	0	0.610662	0.973	0.959	0	1	RPS13
EEF1A1	0	0.872344	0.989	0.975	0	1	EEF1A1
PTMA	0	0.54384	0.991	0.977	0	1	PTMA
RPL34	0	0.686744	0.988	0.975	0	1	RPL34
RPL36	0	0.745161	0.966	0.953	0	1	RPL36
RPL32	0	0.695815	0.974	0.961	0	1	RPL32
RPL31	0	0.678009	0.996	0.984	0	1	RPL31
RPL19	0	0.747865	0.979	0.967	0	1	RPL19
RPL37A	0	0.645648	0.98	0.969	0	1	RPL37A
HSP90AA1	0	1.38504	0.917	0.907	0	1	HSP90AA1
EEF1D	0	0.92308	0.762	0.752	0	1	EEF1D
RPLP1	0	0.930866	1	0.99	0	1	RPLP1
RPL37	0	0.654792	0.993	0.983	0	1	RPL37
EEF1B2	0	0.852466	0.852	0.843	0	1	EEF1B2
RPS6	0	0.672129	0.977	0.969	0	1	RPS6
RPS27	0	1.32277	1	0.992	0	1	RPS27
NFKBIA	0	1.44113	0.825	0.818	0	1	NFKBIA
RPL24	0	0.780861	0.925	0.919	0	1	RPL24
RPL11	0	0.617296	0.985	0.979	0	1	RPL11
EIF1	0	0.574363	0.965	0.96	0	1	EIF1
RPS25	0	0.849285	0.93	0.927	0	1	RPS25
RPL23	0	0.621236	0.953	0.95	0	1	RPL23
HNRNPA1	0	0.830309	0.803	0.801	0	1	HNRNPA1
TMA7	0	0.887365	0.801	0.803	0	1	TMA7
TPT1	0	0.595498	0.976	0.977	0	1	TPT1
RPS11	0	0.595264	0.942	0.941	0	1	RPS11
MALAT1	0	0.96693	1	0.999	0	1	MALAT1
RPL35	0	0.673306	0.938	0.937	0	1	RPL35
B2M	0	0.800819	1	1	0	1	B2M
RPL38	0	0.634767	0.929	0.929	0	1	RPL38
UBA52	0	0.690244	0.92	0.92	0	1	UBA52
CLK1	3.41e-307	1.47464	0.557	0.446	1.04e-302	1	CLK1
SYNE1	1.85e-305	2.14292	0.3	0.141	5.63e-301	1	SYNE1
RBM8A	1.31e-302	1.17608	0.664	0.635	3.98e-298	1	RBM8A
LY6E	2.99e-299	1.29765	0.528	0.363	9.12e-295	1	LY6E
SRSF7	2.42e-294	1.62172	0.599	0.538	7.39e-290	1	SRSF7
MYL12A	1.57e-293	0.721988	0.812	0.796	4.78e-289	1	MYL12A
CD99	2.85e-293	1.13422	0.653	0.597	8.7e-289	1	CD99
RNF213	9.28e-291	1.39283	0.499	0.358	2.83e-286	1	RNF213
GPSM3	4.43e-290	1.45219	0.448	0.286	1.35e-285	1	GPSM3
ATP5F1E	4.96e-288	0.592625	0.922	0.925	1.51e-283	1	ATP5F1E
GMFG	2.95e-285	1.02426	0.612	0.454	9e-281	1	GMFG
SYNRG	6.38e-285	2.11229	0.321	0.169	1.95e-280	1	SYNRG
HSP90AB1	2.3e-272	1.16428	0.844	0.876	7e-268	1	HSP90AB1
TNFAIP8	1.16e-270	1.68487	0.366	0.21	3.53e-266	1	TNFAIP8
OPTN	8.24e-268	1.62518	0.458	0.325	2.51e-263	1	OPTN
ARHGAP9	1.08e-265	2.04735	0.256	0.116	3.3e-261	1	ARHGAP9
UBC	6.47e-265	1.16256	0.816	0.877	1.97e-260	1	UBC
KMT2E	2.79e-263	1.32923	0.56	0.471	8.49e-259	1	KMT2E
ARPC2	1.55e-257	0.639375	0.825	0.786	4.72e-253	1	ARPC2
CFL1	1.28e-256	0.610642	0.856	0.855	3.89e-252	1	CFL1
C5orf56	3e-253	2.39812	0.252	0.119	9.14e-249	1	C5orf56
CD37	3.15e-253	1.05259	0.474	0.305	9.61e-249	1	CD37
IER2	9.62e-253	1.45266	0.621	0.517	2.93e-248	1	IER2
IKZF1	4.14e-252	1.86991	0.292	0.148	1.26e-247	1	IKZF1
ERN1	1.98e-249	2.22626	0.296	0.157	6.02e-245	1	ERN1
MACF1	1.67e-248	1.52784	0.454	0.326	5.08e-244	1	MACF1
PMAIP1	3.05e-248	1.7388	0.373	0.221	9.31e-244	1	PMAIP1
GIMAP2	8.23e-246	1.97737	0.301	0.162	2.51e-241	1	GIMAP2
ITGA4	1.17e-243	1.6317	0.345	0.197	3.57e-239	1	ITGA4
SF3B1	1.74e-240	0.903324	0.701	0.716	5.3e-236	1	SF3B1
TNF	3.51e-240	2.26695	0.334	0.187	1.07e-235	1	TNF
RPS24	1.3e-239	0.507126	0.929	0.933	3.97e-235	1	RPS24
SNHG6	1.07e-237	1.21246	0.594	0.548	3.27e-233	1	SNHG6
RAB8B	3.09e-233	1.58446	0.41	0.277	9.42e-229	1	RAB8B
SARAF	1.21e-231	1.12423	0.628	0.611	3.69e-227	1	SARAF
GPRIN3	4.03e-230	1.81691	0.31	0.172	1.23e-225	1	GPRIN3
CDKN1B	8.97e-224	1.41234	0.504	0.415	2.74e-219	1	CDKN1B
ADGRE5	3.45e-221	1.56459	0.365	0.227	1.05e-216	1	ADGRE5
IQGAP1	4.63e-220	0.870119	0.61	0.487	1.41e-215	1	IQGAP1
NFKBIZ	7.56e-216	1.85599	0.407	0.273	2.3e-211	1	NFKBIZ
TUBA4A	1.06e-208	1.90069	0.309	0.178	3.22e-204	1	TUBA4A
CCSER2	3.24e-208	1.99508	0.301	0.176	9.89e-204	1	CCSER2
TERF2IP	6.52e-207	1.57081	0.444	0.339	1.99e-202	1	TERF2IP
CCND3	1.55e-205	1.61998	0.318	0.187	4.74e-201	1	CCND3
PTGER4	2.88e-205	1.93312	0.263	0.137	8.8e-201	1	PTGER4
PPP1R18	8e-205	1.64741	0.352	0.226	2.44e-200	1	PPP1R18
FOSB	2.02e-204	1.70902	0.41	0.276	6.16e-200	1	FOSB
EPB41	1.66e-203	1.80672	0.329	0.203	5.06e-199	1	EPB41
AC005912.1	6.36e-203	1.52798	0.433	0.338	1.94e-198	1	AC005912.1
APBB1IP	4.52e-201	1.38254	0.409	0.284	1.38e-196	1	APBB1IP
KIF2A	5.34e-201	1.86632	0.279	0.154	1.63e-196	1	KIF2A
RPL21P28	8.75e-200	1.60285	0.384	0.272	2.67e-195	1	RPL21P28
AES	5.21e-199	1.44914	0.442	0.335	1.59e-194	1	AES
SRSF11	6.53e-199	1.01621	0.617	0.61	1.99e-194	1	SRSF11
ANXA1	2.67e-198	0.939908	0.546	0.399	8.15e-194	1	ANXA1
PRKACB	1.07e-196	1.83373	0.323	0.202	3.26e-192	1	PRKACB
RPS10	9.31e-196	1.24877	0.509	0.45	2.84e-191	1	RPS10
CYCS	1.89e-195	1.61759	0.57	0.567	5.77e-191	1	CYCS
PPDPF	7.19e-195	0.703742	0.749	0.753	2.19e-190	1	PPDPF
RPL6	2.14e-193	0.551659	0.871	0.909	6.53e-189	1	RPL6
CCNH	5.88e-189	1.84933	0.358	0.245	1.79e-184	1	CCNH
UBB	1.39e-188	0.984862	0.904	0.937	4.25e-184	1	UBB
CLIC1	6.13e-188	0.732484	0.701	0.651	1.87e-183	1	CLIC1
ARHGAP30	7.45e-187	1.5867	0.304	0.179	2.27e-182	1	ARHGAP30
APOBEC3C	9.11e-187	1.62237	0.31	0.186	2.78e-182	1	APOBEC3C
DDX24	2.67e-186	1.41702	0.504	0.446	8.15e-182	1	DDX24
ATM	1.54e-185	1.61944	0.333	0.212	4.69e-181	1	ATM
RPL10A	5.51e-185	0.738326	0.732	0.768	1.68e-180	1	RPL10A
RPS5	1.25e-184	0.567127	0.863	0.884	3.82e-180	1	RPS5
ARHGEF1	3.29e-183	1.6883	0.284	0.164	1e-178	1	ARHGEF1
DDIT4	4.01e-180	0.926817	0.545	0.431	1.22e-175	1	DDIT4
PAXX	4.9e-179	1.72443	0.376	0.273	1.49e-174	1	PAXX
RPL23AP42	2.23e-178	1.35077	0.452	0.376	6.81e-174	1	RPL23AP42
RPL13P12	1.47e-176	1.3447	0.446	0.361	4.49e-172	1	RPL13P12
ZFP36	1.54e-176	1.00738	0.726	0.725	4.7e-172	1	ZFP36
IFI16	8.85e-176	0.953675	0.567	0.478	2.7e-171	1	IFI16
MSN	3.26e-175	0.958963	0.555	0.47	9.95e-171	1	MSN
ABRACL	3.43e-174	1.37817	0.424	0.317	1.05e-169	1	ABRACL
CELF2	2.02e-173	1.34795	0.359	0.238	6.17e-169	1	CELF2
LDHB	2.56e-167	1.1264	0.459	0.351	7.82e-163	1	LDHB
ARPC5L	1.05e-166	1.79355	0.358	0.26	3.21e-162	1	ARPC5L
PPP1R2	1.15e-166	1.76975	0.329	0.221	3.5e-162	1	PPP1R2
SLC2A3	1.89e-166	1.11428	0.34	0.209	5.76e-162	1	SLC2A3
DUSP1	7.02e-163	0.949046	0.728	0.753	2.14e-158	1	DUSP1
AKAP13	1.75e-160	1.23713	0.441	0.354	5.34e-156	1	AKAP13
PPP2R5C	6.66e-158	1.71987	0.366	0.275	2.03e-153	1	PPP2R5C
ZBTB38	1.52e-157	1.79734	0.332	0.23	4.62e-153	1	ZBTB38
TAF7	1.77e-157	1.43266	0.451	0.391	5.39e-153	1	TAF7
SON	2.95e-153	0.777409	0.687	0.738	9.01e-149	1	SON
ABHD17A	4.29e-151	1.86824	0.274	0.171	1.31e-146	1	ABHD17A
LPXN	9.05e-150	1.6914	0.265	0.16	2.76e-145	1	LPXN
ATF7IP	4e-149	1.64525	0.326	0.225	1.22e-144	1	ATF7IP
COMMD6	9.41e-148	0.887519	0.638	0.663	2.87e-143	1	COMMD6
LIMD2	4.34e-147	1.15759	0.406	0.297	1.32e-142	1	LIMD2
CMTM3	9.01e-147	1.21368	0.383	0.272	2.75e-142	1	CMTM3
OFD1	1.57e-144	1.69437	0.29	0.187	4.78e-140	1	OFD1
ZBTB1	6.77e-138	1.77736	0.283	0.186	2.06e-133	1	ZBTB1
SNHG5	5.09e-137	1.16417	0.501	0.455	1.55e-132	1	SNHG5
ZFAS1	8.65e-137	0.969743	0.554	0.526	2.64e-132	1	ZFAS1
CFLAR	3.47e-134	1.13826	0.509	0.471	1.06e-129	1	CFLAR
BIRC3	2.6e-132	1.10836	0.373	0.27	7.92e-128	1	BIRC3
OST4	3.21e-132	0.609647	0.788	0.838	9.8e-128	1	OST4
SLAMF7	2.6e-131	1.19056	0.275	0.166	7.93e-127	1	SLAMF7
LCP2	2.82e-131	1.1221	0.363	0.259	8.61e-127	1	LCP2
FXYD5	1.43e-130	0.818022	0.571	0.496	4.35e-126	1	FXYD5
RNF44	1.72e-128	1.71921	0.253	0.158	5.26e-124	1	RNF44
DOK2	5.11e-128	1.62953	0.271	0.173	1.56e-123	1	DOK2
G3BP2	1.53e-127	1.56171	0.373	0.3	4.68e-123	1	G3BP2
UTRN	2.21e-127	1.18736	0.382	0.29	6.73e-123	1	UTRN
CACYBP	9.8e-127	1.51919	0.478	0.461	2.99e-122	1	CACYBP
RPL36AL	1.31e-126	0.669843	0.732	0.8	3.99e-122	1	RPL36AL
TPM3	1.43e-126	0.6306	0.698	0.711	4.37e-122	1	TPM3
EML4	7.98e-125	1.37269	0.432	0.381	2.43e-120	1	EML4
NPM1	6.06e-124	0.609205	0.753	0.799	1.85e-119	1	NPM1
NCL	6.97e-124	0.680082	0.704	0.774	2.12e-119	1	NCL
EGR1	3.7e-122	1.65317	0.421	0.346	1.13e-117	1	EGR1
TRIM22	5.82e-121	1.29871	0.342	0.248	1.78e-116	1	TRIM22
RPL9P9	2.62e-119	0.98947	0.537	0.542	7.98e-115	1	RPL9P9
VAMP2	1.41e-118	1.46679	0.347	0.268	4.3e-114	1	VAMP2
GLIPR1	1.52e-118	0.920887	0.442	0.341	4.65e-114	1	GLIPR1
FGFR1OP2	4.19e-115	1.56647	0.328	0.25	1.28e-110	1	FGFR1OP2
CCNL1	7.78e-115	0.994298	0.504	0.472	2.37e-110	1	CCNL1
DNAJA1	4.24e-114	1.59243	0.595	0.662	1.29e-109	1	DNAJA1
CCL3	8.85e-114	1.29443	0.495	0.41	2.7e-109	1	CCL3
CASP8	2.01e-113	1.80085	0.265	0.18	6.13e-109	1	CASP8
PRPF38B	1.95e-112	1.226	0.412	0.349	5.94e-108	1	PRPF38B
HNRNPA3	5.87e-112	0.774918	0.62	0.673	1.79e-107	1	HNRNPA3
EZR	4.51e-111	0.992748	0.426	0.351	1.37e-106	1	EZR
DDX6	3.63e-107	1.48912	0.325	0.251	1.11e-102	1	DDX6
PRMT2	3.38e-105	1.48616	0.323	0.244	1.03e-100	1	PRMT2
CYTOR	4.15e-104	1.69968	0.329	0.253	1.27e-99	1	CYTOR
ARL6IP5	5.41e-104	0.899937	0.551	0.548	1.65e-99	1	ARL6IP5
RPL22	1.28e-102	0.606937	0.713	0.784	3.89e-98	1	RPL22
SP100	6.11e-102	1.11289	0.454	0.424	1.86e-97	1	SP100
PSME1	7.15e-100	0.627386	0.734	0.797	2.18e-95	1	PSME1
CD44	2.04e-99	0.864781	0.401	0.312	6.21e-95	1	CD44
GYPC	6.96e-99	1.06302	0.337	0.248	2.12e-94	1	GYPC
HSPH1	3.19e-98	1.63929	0.404	0.348	9.73e-94	1	HSPH1
CYLD	1.2e-97	1.53562	0.254	0.173	3.66e-93	1	CYLD
EMP3	3.19e-97	0.796034	0.509	0.436	9.73e-93	1	EMP3
OSTF1	7.2e-96	1.24027	0.394	0.345	2.2e-91	1	OSTF1
PSMB9	3.36e-93	0.8953	0.522	0.505	1.03e-88	1	PSMB9
MAP1LC3B	1.35e-90	1.03457	0.464	0.445	4.11e-86	1	MAP1LC3B
ANAPC16	1.02e-88	1.05671	0.505	0.527	3.11e-84	1	ANAPC16
BCLAF1	2.83e-88	1.15687	0.417	0.384	8.64e-84	1	BCLAF1
VPS13C	2.61e-86	1.15833	0.391	0.34	7.96e-82	1	VPS13C
SNRPD2	4.9e-85	0.671272	0.654	0.726	1.49e-80	1	SNRPD2
CHD2	2.39e-83	1.32413	0.309	0.242	7.29e-79	1	CHD2
HSPE1	2.74e-83	1.0189	0.659	0.729	8.36e-79	1	HSPE1
FNBP1	2.98e-82	0.997418	0.398	0.339	9.1e-78	1	FNBP1
2025-09-06	8.45e-82	1.37019	0.302	0.237	2.58e-77	1	2025-09-06
ITGB2	2.15e-81	0.542041	0.497	0.401	6.54e-77	1	ITGB2
EVI2A	7.06e-78	1.23551	0.269	0.195	2.15e-73	1	EVI2A
MGEA5	9.05e-78	1.36923	0.291	0.227	2.76e-73	1	MGEA5
JUND	1.59e-76	1.01397	0.446	0.422	4.84e-72	1	JUND
RBMX	9.04e-76	0.949557	0.485	0.498	2.76e-71	1	RBMX
DDX17	6.98e-73	0.869127	0.5	0.519	2.13e-68	1	DDX17
HNRNPC	8.15e-73	0.699592	0.602	0.684	2.49e-68	1	HNRNPC
FNBP4	2.51e-71	1.19694	0.336	0.285	7.64e-67	1	FNBP4
CDC42SE1	4.62e-71	1.39589	0.277	0.216	1.41e-66	1	CDC42SE1
HNRNPD	1.17e-70	0.592554	0.636	0.714	3.56e-66	1	HNRNPD
RABGAP1L	4.86e-70	1.41526	0.269	0.207	1.48e-65	1	RABGAP1L
IL16	1.96e-69	1.19489	0.277	0.209	5.98e-65	1	IL16
EPC1	9.14e-69	1.45197	0.303	0.251	2.79e-64	1	EPC1
BUB3	9.41e-69	1.3568	0.338	0.298	2.87e-64	1	BUB3
RAD21	4.84e-67	0.83994	0.486	0.5	1.48e-62	1	RAD21
TOMM7	2.95e-65	0.657764	0.639	0.72	8.99e-61	1	TOMM7
SMCHD1	5.11e-65	0.650333	0.379	0.324	1.56e-60	1	SMCHD1
RPL18AP3	7.46e-64	1.08227	0.394	0.376	2.27e-59	1	RPL18AP3
MBP	1.14e-62	1.41509	0.25	0.191	3.48e-58	1	MBP
FAM107B	6.93e-61	1.33832	0.328	0.291	2.11e-56	1	FAM107B
SET	1.85e-60	0.674399	0.586	0.656	5.65e-56	1	SET
GTF3A	2.48e-60	1.16529	0.412	0.416	7.56e-56	1	GTF3A
YTHDC1	2.81e-60	1.17893	0.36	0.328	8.57e-56	1	YTHDC1
NAP1L4	7.14e-60	1.44297	0.302	0.261	2.18e-55	1	NAP1L4
GSTP1	8.51e-60	0.538443	0.616	0.556	2.59e-55	1	GSTP1
ACTR3	5.32e-59	0.739789	0.51	0.524	1.62e-54	1	ACTR3
SMARCA5	9.23e-59	0.995906	0.413	0.401	2.81e-54	1	SMARCA5
CCDC85B	1.21e-58	1.33005	0.252	0.194	3.69e-54	1	CCDC85B
CCNI	6.45e-58	0.68547	0.547	0.582	1.97e-53	1	CCNI
EVI2B	4.28e-57	0.631129	0.401	0.343	1.3e-52	1	EVI2B
KMT2A	3.43e-56	1.26396	0.258	0.203	1.05e-51	1	KMT2A
ARL4C	4.2e-56	0.595708	0.38	0.309	1.28e-51	1	ARL4C
FUBP1	5.43e-56	1.32445	0.29	0.246	1.65e-51	1	FUBP1
ARGLU1	2.43e-54	0.869123	0.436	0.428	7.4e-50	1	ARGLU1
FOS	4.1e-54	0.747071	0.684	0.708	1.25e-49	1	FOS
SRSF3	2.11e-52	0.932115	0.481	0.521	6.43e-48	1	SRSF3
ACTR2	6.99e-52	0.560027	0.579	0.618	2.13e-47	1	ACTR2
PRRC2C	7.67e-52	0.750049	0.521	0.576	2.34e-47	1	PRRC2C
EIF3G	3.67e-51	1.2048	0.41	0.428	1.12e-46	1	EIF3G
SRSF5	1.48e-50	0.880057	0.49	0.543	4.52e-46	1	SRSF5
TGFB1	2.47e-50	1.03203	0.284	0.234	7.54e-46	1	TGFB1
CDC42	2.88e-49	0.59085	0.592	0.671	8.79e-45	1	CDC42
LYST	4.63e-49	1.28825	0.272	0.225	1.41e-44	1	LYST
CIRBP	5.51e-48	0.837162	0.484	0.532	1.68e-43	1	CIRBP
APRT	1.24e-47	0.910411	0.508	0.57	3.79e-43	1	APRT
NR4A1	5.19e-47	1.05162	0.335	0.288	1.58e-42	1	NR4A1
CAPZB	1.37e-46	0.599143	0.579	0.646	4.17e-42	1	CAPZB
SRSF2	2.75e-46	0.906274	0.474	0.519	8.4e-42	1	SRSF2
RPL41P5	1e-44	1.27406	0.324	0.308	3.06e-40	1	RPL41P5
TLN1	8.6e-44	0.709423	0.487	0.501	2.62e-39	1	TLN1
RNF19A	8.27e-42	1.43976	0.28	0.248	2.52e-37	1	RNF19A
AC007969.1	4.57e-41	1.19674	0.317	0.302	1.39e-36	1	AC007969.1
PNISR	5.23e-41	0.960015	0.388	0.384	1.59e-36	1	PNISR
CLDND1	1.21e-39	1.50902	0.264	0.234	3.68e-35	1	CLDND1
ICAM3	1.52e-39	1.20483	0.268	0.233	4.63e-35	1	ICAM3
LPAR6	6.32e-39	0.787311	0.338	0.295	1.93e-34	1	LPAR6
ATRX	7e-39	0.81763	0.434	0.448	2.14e-34	1	ATRX
PTPN2	2.71e-38	1.1811	0.299	0.273	8.26e-34	1	PTPN2
C9orf16	2.32e-37	1.16996	0.377	0.384	7.07e-33	1	C9orf16
PHF20	4.09e-37	1.26974	0.276	0.245	1.25e-32	1	PHF20
YPEL5	1.18e-36	1.2886	0.341	0.34	3.6e-32	1	YPEL5
RSRC2	9.57e-36	0.93198	0.431	0.463	2.92e-31	1	RSRC2
RAP1B	5.65e-35	1.10813	0.33	0.32	1.72e-30	1	RAP1B
PNN	7.84e-35	1.04443	0.347	0.341	2.39e-30	1	PNN
BRD2	8.65e-34	1.07994	0.399	0.427	2.64e-29	1	BRD2
RBM25	9.55e-34	0.932822	0.387	0.396	2.91e-29	1	RBM25
PPP1R12A	1.92e-33	0.903621	0.342	0.329	5.85e-29	1	PPP1R12A
KLF6	6.02e-33	0.767976	0.582	0.637	1.84e-28	1	KLF6
MIER1	2.02e-32	1.25259	0.269	0.244	6.16e-28	1	MIER1
ANXA6	1.11e-31	1.0742	0.302	0.286	3.39e-27	1	ANXA6
AOAH	1.7e-31	0.961536	0.26	0.222	5.19e-27	1	AOAH
RPL3P4	5.18e-31	1.14809	0.288	0.275	1.58e-26	1	RPL3P4
CKLF	1.42e-30	1.04034	0.295	0.272	4.34e-26	1	CKLF
SRRM1	2.81e-30	0.740655	0.486	0.552	8.57e-26	1	SRRM1
EIF4G2	3.99e-30	0.530605	0.583	0.682	1.22e-25	1	EIF4G2
HNRNPH1	2.91e-29	0.960668	0.37	0.389	8.88e-25	1	HNRNPH1
POLR2B	8.55e-29	1.18367	0.278	0.261	2.61e-24	1	POLR2B
PCM1	1.57e-28	0.991639	0.338	0.335	4.8e-24	1	PCM1
SMAP2	1.37e-27	0.550665	0.483	0.509	4.17e-23	1	SMAP2
PSMB8	5.27e-27	0.821772	0.439	0.484	1.61e-22	1	PSMB8
SNHG8	6.3e-27	0.776088	0.509	0.59	1.92e-22	1	SNHG8
DDX3X	8.48e-26	0.912331	0.416	0.451	2.59e-21	1	DDX3X
TRA2A	1.02e-25	1.23796	0.256	0.238	3.11e-21	1	TRA2A
FAM204A	1.1e-25	0.504614	0.185	0.284	3.36e-21	1	FAM204A
MED4	1e-24	0.501358	0.18	0.276	3.05e-20	1	MED4
KMT2C	1.2e-24	0.94939	0.323	0.32	3.66e-20	1	KMT2C
2025-09-09	1.78e-24	1.13607	0.254	0.235	5.43e-20	1	2025-09-09
TAF1D	2.08e-24	1.06377	0.309	0.305	6.34e-20	1	TAF1D
CEBPZ	2.3e-24	0.531011	0.195	0.298	7.01e-20	1	CEBPZ
MRPL42	4.73e-24	0.57945	0.169	0.261	1.44e-19	1	MRPL42
EMD	1.47e-23	0.584967	0.173	0.268	4.48e-19	1	EMD
TCF25	1.51e-23	0.853794	0.417	0.457	4.61e-19	1	TCF25
UFM1	2.13e-23	0.514796	0.234	0.358	6.5e-19	1	UFM1
GCC2	7.48e-23	1.00692	0.324	0.323	2.28e-18	1	GCC2
TRA2B	1.1e-22	0.830503	0.395	0.421	3.35e-18	1	TRA2B
PSMD13	1.23e-22	0.500611	0.186	0.282	3.75e-18	1	PSMD13
BROX	3.42e-22	0.593821	0.19	0.288	1.04e-17	1	BROX
TMX4	3.44e-22	1.11432	0.265	0.254	1.05e-17	1	TMX4
ADD3	4.13e-22	0.948411	0.282	0.267	1.26e-17	1	ADD3
SRI	4.67e-22	1.00096	0.332	0.339	1.42e-17	1	SRI
FAM49B	1.17e-21	0.792497	0.334	0.332	3.56e-17	1	FAM49B
NCOR1	1.33e-21	0.9083	0.379	0.411	4.05e-17	1	NCOR1
SAMSN1	1.76e-21	0.526358	0.287	0.255	5.36e-17	1	SAMSN1
STARD7	2.69e-21	0.526897	0.235	0.354	8.2e-17	1	STARD7
TOX4	3.15e-21	0.572382	0.165	0.251	9.6e-17	1	TOX4
BZW1	6.89e-21	0.980891	0.357	0.392	2.1e-16	1	BZW1
VPS26A	9e-21	0.525944	0.182	0.274	2.74e-16	1	VPS26A
SMIM10L1	1.27e-20	0.618644	0.178	0.267	3.86e-16	1	SMIM10L1
HNRNPU	1.29e-20	0.534004	0.54	0.644	3.94e-16	1	HNRNPU
ZCCHC11	1.3e-20	1.18577	0.256	0.244	3.95e-16	1	ZCCHC11
HBP1	2.42e-20	0.531206	0.176	0.265	7.39e-16	1	HBP1
SRRM2	2.45e-20	0.63406	0.453	0.51	7.47e-16	1	SRRM2
COPS2	5.29e-20	0.532008	0.168	0.251	1.61e-15	1	COPS2
SAR1A	2.3e-19	0.522326	0.181	0.27	7.02e-15	1	SAR1A
CWF19L2	4.13e-19	1.15476	0.285	0.283	1.26e-14	1	CWF19L2
CIR1	6.76e-19	0.526698	0.205	0.302	2.06e-14	1	CIR1
C9orf78	7.39e-19	1.03528	0.348	0.381	2.25e-14	1	C9orf78
NEMF	1.08e-18	0.520079	0.179	0.263	3.29e-14	1	NEMF
PIN1	1.92e-18	0.632168	0.177	0.262	5.86e-14	1	PIN1
SSU72	1.97e-18	0.509836	0.245	0.363	6e-14	1	SSU72
GUK1	2.24e-18	0.671626	0.488	0.586	6.84e-14	1	GUK1
NOP58	3.78e-18	1.02661	0.334	0.356	1.15e-13	1	NOP58
CASP4	5.64e-18	0.896815	0.324	0.332	1.72e-13	1	CASP4
TBCB	1.5e-17	0.901785	0.352	0.375	4.56e-13	1	TBCB
RPL22L1	3.05e-17	1.0188	0.329	0.346	9.31e-13	1	RPL22L1
RAP1A	1.52e-16	0.796374	0.375	0.409	4.63e-12	1	RAP1A
ARID4B	1.93e-16	0.968658	0.299	0.304	5.89e-12	1	ARID4B
PNRC2	2.85e-16	0.972145	0.303	0.312	8.7e-12	1	PNRC2
ARF6	3.59e-16	0.992034	0.298	0.308	1.09e-11	1	ARF6
HNRNPH3	4.75e-16	0.884667	0.346	0.373	1.45e-11	1	HNRNPH3
GADD45B	7.63e-16	0.757242	0.611	0.71	2.33e-11	1	GADD45B
SLTM	8.27e-16	0.935987	0.349	0.378	2.52e-11	1	SLTM
REL	1.68e-15	0.914461	0.252	0.238	5.11e-11	1	REL
CARD16	1.78e-15	0.700222	0.36	0.364	5.42e-11	1	CARD16
MZT2A	3.84e-15	0.613296	0.22	0.314	1.17e-10	1	MZT2A
RPS19BP1	6.68e-15	0.60828	0.241	0.347	2.04e-10	1	RPS19BP1
SELENOT	8.51e-15	0.515895	0.244	0.355	2.59e-10	1	SELENOT
RABAC1	9.06e-15	0.507874	0.187	0.265	2.76e-10	1	RABAC1
DNMT1	1.35e-14	0.969837	0.261	0.256	4.12e-10	1	DNMT1
ANP32E	1.48e-14	1.01644	0.295	0.305	4.5e-10	1	ANP32E
GPBP1	1.49e-14	0.931456	0.331	0.358	4.55e-10	1	GPBP1
MYH9	3.95e-14	0.708104	0.35	0.371	1.2e-09	1	MYH9
WBP11	5.7e-14	0.606877	0.2	0.287	1.74e-09	1	WBP11
PCGF5	6.85e-14	0.62577	0.187	0.267	2.09e-09	1	PCGF5
SERBP1	1.08e-13	0.600449	0.515	0.64	3.31e-09	1	SERBP1
GAS5	1.65e-13	0.772873	0.384	0.429	5.04e-09	1	GAS5
NRBP1	2.32e-13	0.624072	0.199	0.284	7.08e-09	1	NRBP1
SLK	3.14e-13	0.905163	0.307	0.322	9.59e-09	1	SLK
POLR2K	3.94e-13	0.66192	0.242	0.35	1.2e-08	1	POLR2K
CCT4	4.72e-13	0.986948	0.36	0.408	1.44e-08	1	CCT4
UBE2L3	6.3e-13	0.514923	0.247	0.352	1.92e-08	1	UBE2L3
ELOVL5	8.15e-13	0.573885	0.179	0.252	2.49e-08	1	ELOVL5
CITED2	9.99e-13	1.03337	0.304	0.309	3.05e-08	1	CITED2
RSL24D1	1.01e-12	0.549939	0.238	0.339	3.07e-08	1	RSL24D1
SETD2	1.01e-12	0.991556	0.291	0.305	3.07e-08	1	SETD2
N4BP2L2	2.13e-12	0.946314	0.298	0.312	6.49e-08	1	N4BP2L2
ORMDL1	2.97e-12	0.647139	0.201	0.285	9.05e-08	1	ORMDL1
SNW1	4.28e-12	0.561275	0.254	0.361	1.3e-07	1	SNW1
LSM14A	6.02e-12	1.01348	0.272	0.283	1.84e-07	1	LSM14A
PRPF4B	6.36e-12	0.878483	0.357	0.398	1.94e-07	1	PRPF4B
PHF3	1.1e-11	0.786447	0.39	0.452	3.35e-07	1	PHF3
SELENOK	1.19e-11	0.707394	0.464	0.563	3.64e-07	1	SELENOK
DENR	2.7e-11	0.686031	0.184	0.257	8.22e-07	1	DENR
CMC2	3.5e-11	0.68432	0.243	0.344	1.07e-06	1	CMC2
PAK2	7.3e-11	0.76648	0.382	0.438	2.22e-06	1	PAK2
MEAF6	9.2e-11	0.580109	0.211	0.294	2.81e-06	1	MEAF6
MAT2B	9.28e-11	0.952423	0.305	0.333	2.83e-06	1	MAT2B
RWDD1	1.1e-10	0.632984	0.267	0.376	3.35e-06	1	RWDD1
WTAP	3.65e-10	0.995931	0.25	0.256	1.11e-05	1	WTAP
SRSF4	4.02e-10	0.942751	0.315	0.346	1.23e-05	1	SRSF4
RPS4Y1	5.17e-10	0.71952	0.341	0.367	1.58e-05	1	RPS4Y1
ITSN2	6.48e-10	0.636587	0.361	0.392	1.98e-05	1	ITSN2
PPIE	6.71e-10	0.700837	0.217	0.3	2.04e-05	1	PPIE
KRT10	9.68e-10	0.529799	0.31	0.435	2.95e-05	1	KRT10
DHX36	1.11e-09	1.02802	0.259	0.268	3.39e-05	1	DHX36
PCNP	1.34e-09	0.543452	0.257	0.359	4.1e-05	1	PCNP
NSD3	1.67e-09	0.894488	0.258	0.264	5.09e-05	1	NSD3
PTP4A2	2.41e-09	0.903106	0.341	0.385	7.36e-05	1	PTP4A2
SP110	3.35e-09	0.761487	0.292	0.304	0.000102178	1	SP110
BCAS2	3.93e-09	1.37142	0.264	0.282	0.000119892	1	BCAS2
SNRPB2	6.45e-09	0.577662	0.286	0.4	0.000196719	1	SNRPB2
EFCAB14	8.64e-09	0.536209	0.199	0.269	0.000263515	1	EFCAB14
ZMAT2	8.81e-09	0.66523	0.237	0.329	0.000268487	1	ZMAT2
PPP1R10	1.07e-08	0.636237	0.187	0.252	0.000325488	1	PPP1R10
GGNBP2	2.13e-08	0.612128	0.214	0.291	0.000650544	1	GGNBP2
DNTTIP2	2.55e-08	0.726339	0.226	0.309	0.000776314	1	DNTTIP2
SNRNP70	2.59e-08	0.562518	0.193	0.26	0.000788933	1	SNRNP70
OCIAD21	2.82e-08	0.585121	0.207	0.276	0.000858717	1	OCIAD2
USP16	4.86e-08	0.647341	0.21	0.283	0.00148249	1	USP16
PDCD10	5.85e-08	0.673313	0.223	0.303	0.00178431	1	PDCD10
CCDC107	8.36e-08	0.76521	0.225	0.308	0.00254816	1	CCDC107
CGGBP1	9.55e-08	1.02617	0.278	0.304	0.00291175	1	CGGBP1
SLU7	1.02e-07	0.654636	0.208	0.281	0.00311754	1	SLU7
ANKRD12	1.09e-07	0.75746	0.359	0.407	0.00332165	1	ANKRD12
TRIP12	1.23e-07	0.532735	0.224	0.299	0.00376152	1	TRIP12
2025-03-07	1.81e-07	0.949733	0.261	0.278	0.00552963	1	2025-03-07
PAFAH1B1	1.98e-07	0.91756	0.285	0.311	0.00603678	1	PAFAH1B1
XRCC5	2.57e-07	0.546739	0.485	0.61	0.00782064	1	XRCC5
SFPQ	3.29e-07	0.605319	0.429	0.521	0.0100423	1	SFPQ
CFAP97	3.36e-07	1.08358	0.262	0.282	0.0102341	1	CFAP97
PLP2	3.54e-07	0.688833	0.258	0.26	0.0107962	1	PLP2
STAG2	3.91e-07	0.539021	0.266	0.361	0.0119123	1	STAG2
ISG15	4.56e-07	0.718948	0.326	0.35	0.013901	1	ISG15
CIB1	8.85e-07	0.818606	0.375	0.447	0.0269791	1	CIB1
UBXN1	9.26e-07	0.716066	0.385	0.457	0.0282353	1	UBXN1
CD47	9.44e-07	0.567309	0.246	0.33	0.0287832	1	CD47
SLC9A3R1	1.13e-06	0.951953	0.287	0.319	0.0344777	1	SLC9A3R1
DHRS7	1.55e-06	0.704606	0.389	0.457	0.0471735	1	DHRS7
SMC3	1.57e-06	0.591962	0.249	0.333	0.0478852	1	SMC3
PTPN1	2.21e-06	0.71635	0.268	0.281	0.0674608	1	PTPN1
PARP1	2.35e-06	0.562443	0.266	0.358	0.0717473	1	PARP1
WNK1	2.45e-06	0.545878	0.243	0.323	0.0746084	1	WNK1
ATXN2L	2.52e-06	0.95644	0.238	0.25	0.0768342	1	ATXN2L
MPHOSPH8	3.92e-06	0.910787	0.328	0.373	0.119373	1	MPHOSPH8
PPP4R3B	3.92e-06	0.712617	0.211	0.282	0.119543	1	PPP4R3B
ARPC4	3.95e-06	0.726712	0.306	0.337	0.120491	1	ARPC4
SF3B5	4.73e-06	0.718813	0.438	0.541	0.144201	1	SF3B5
USP15	5.09e-06	0.708248	0.311	0.341	0.155107	1	USP15
DHX9	5.51e-06	0.666655	0.198	0.261	0.167983	1	DHX9
LITAF	6.61e-06	0.557443	0.432	0.508	0.20155	1	LITAF
PCMTD1	9.15e-06	0.586969	0.239	0.316	0.278992	1	PCMTD1
FUS	1.15e-05	0.75703	0.38	0.456	0.350831	1	FUS
POLR1D	1.44e-05	0.749866	0.362	0.425	0.438974	1	POLR1D
PPHLN1	1.62e-05	0.734354	0.198	0.259	0.493301	1	PPHLN1
IRF2	2.04e-05	0.657033	0.239	0.317	0.620937	1	IRF2
UBE2D2	2.49e-05	0.84287	0.333	0.391	0.758986	1	UBE2D2
DYNC1H1	3.09e-05	0.518063	0.207	0.265	0.940834	1	DYNC1H1
APMAP	3.85e-05	0.97148	0.282	0.319	1	1	APMAP
NUCB2	3.98e-05	0.629299	0.399	0.468	1	1	NUCB2
CREM	4.11e-05	1.04745	0.292	0.327	1	1	CREM
SF1	4.64e-05	0.599153	0.235	0.308	1	1	SF1
DDX46	5.22e-05	0.667027	0.222	0.289	1	1	DDX46
ARPP19	0.000101074	0.674768	0.229	0.302	1	1	ARPP19
EIF4A3	0.000133521	0.991826	0.338	0.458	1	1	EIF4A3
DNAJC8	0.000133586	0.522424	0.363	0.5	1	1	DNAJC8
TMED4	0.000139827	0.639187	0.289	0.392	1	1	TMED4
CHD4	0.000150492	0.573463	0.223	0.285	1	1	CHD4
ACIN1	0.000168299	0.825549	0.276	0.306	1	1	ACIN1
ARRDC3	0.000192782	0.566371	0.214	0.273	1	1	ARRDC3
TANK	0.000214298	0.982597	0.288	0.33	1	1	TANK
WDR33	0.00029614	0.773136	0.22	0.287	1	1	WDR33
SRSF10	0.000371216	0.612504	0.274	0.36	1	1	SRSF10
NUB1	0.000472655	0.89813	0.279	0.317	1	1	NUB1
TRAPPC1	0.00049234	0.86285	0.265	0.296	1	1	TRAPPC1
IK	0.00054893	0.815655	0.341	0.408	1	1	IK
NR3C1	0.000582729	0.95033	0.295	0.343	1	1	NR3C1
EWSR1	0.00086371	0.732131	0.327	0.385	1	1	EWSR1
RBM3	0.00100089	0.506721	0.414	0.501	1	1	RBM3
SHISA5	0.0010339	0.862092	0.256	0.284	1	1	SHISA5
PAPOLA	0.00135606	0.623752	0.407	0.513	1	1	PAPOLA
NOP53	0.00174682	0.585578	0.425	0.523	1	1	NOP53
APOL6	0.00174952	0.900093	0.252	0.28	1	1	APOL6
IVNS1ABP	0.00181853	0.608577	0.267	0.29	1	1	IVNS1ABP
RBBP6	0.00223713	0.842597	0.274	0.306	1	1	RBBP6
LBR	0.00229621	0.608854	0.266	0.345	1	1	LBR
EIF4B	0.00233202	0.673222	0.356	0.431	1	1	EIF4B
DYNLT1	0.00253466	0.568306	0.306	0.397	1	1	DYNLT1
EFHD2	0.0027245	0.657102	0.305	0.336	1	1	EFHD2
DNAJB6	0.00285596	0.68666	0.213	0.27	1	1	DNAJB6
KARS	0.00335361	0.723882	0.225	0.288	1	1	KARS
PAF1	0.0064079	1.04546	0.247	0.278	1	1	PAF1
PRPF40A	0.00679661	0.554282	0.446	0.57	1	1	PRPF40A
GBP2	0.00809362	0.724484	0.248	0.271	1	1	GBP2
STAT1	0.00866516	0.655914	0.367	0.427	1	1	STAT1
ABI1	0.00975994	0.660515	0.228	0.288	1	1	ABI1
FOLR2	0	4.57001	0.895	0.105	0	2	FOLR2
LILRB5	0	5.21691	0.825	0.052	0	2	LILRB5
MS4A7	0	3.95568	0.968	0.197	0	2	MS4A7
CD163	0	4.36978	0.945	0.176	0	2	CD163
MSR1	0	3.69995	0.877	0.12	0	2	MSR1
CXCL12	0	4.62622	0.82	0.072	0	2	CXCL12
FCGR3A	0	3.91814	0.9	0.164	0	2	FCGR3A
C1QC	0	4.36968	0.986	0.251	0	2	C1QC
C1QA	0	4.43485	0.991	0.261	0	2	C1QA
MS4A4A	0	3.57895	0.843	0.117	0	2	MS4A4A
GPNMB	0	3.10531	0.833	0.122	0	2	GPNMB
CSF1R	0	3.20092	0.871	0.168	0	2	CSF1R
MRC1	0	2.76245	0.888	0.203	0	2	MRC1
IGSF6	0	2.64355	0.933	0.249	0	2	IGSF6
VCAM1	0	4.65003	0.779	0.097	0	2	VCAM1
C1QB	0	4.4033	0.989	0.31	0	2	C1QB
MS4A6A	0	2.48098	0.979	0.319	0	2	MS4A6A
CYBB	0	2.69457	0.86	0.204	0	2	CYBB
MPEG1	0	2.7425	0.855	0.2	0	2	MPEG1
LGMN	0	3.23568	0.922	0.268	0	2	LGMN
MAFB	0	2.53475	0.884	0.236	0	2	MAFB
HMOX1	0	4.17477	0.815	0.168	0	2	HMOX1
VSIG4	0	3.90739	0.759	0.122	0	2	VSIG4
ADAP2	0	3.77482	0.723	0.088	0	2	ADAP2
CPVL	0	2.17446	0.91	0.28	0	2	CPVL
CD68	0	3.49149	0.748	0.119	0	2	CD68
CD5L	0	5.98202	0.699	0.081	0	2	CD5L
AIF1	0	2.1278	0.972	0.356	0	2	AIF1
FGL2	0	2.04439	0.969	0.356	0	2	FGL2
SDC3	0	5.31873	0.651	0.039	0	2	SDC3
LIPA	0	3.87853	0.935	0.324	0	2	LIPA
CFD	0	3.93909	0.696	0.099	0	2	CFD
PLD3	0	3.49196	0.908	0.313	0	2	PLD3
ARL4C1	0	2.29581	0.85	0.262	0	2	ARL4C
DAB2	0	2.63931	0.763	0.176	0	2	DAB2
CD84	0	2.91803	0.705	0.123	0	2	CD84
C3AR1	0	2.78629	0.701	0.124	0	2	C3AR1
EPB41L2	0	3.2905	0.727	0.156	0	2	EPB41L2
LST1	0	1.37181	0.881	0.315	0	2	LST1
FCER1G	0	2.08299	0.983	0.422	0	2	FCER1G
MAF	0	2.30073	0.749	0.195	0	2	MAF
CXCL16	0	1.85386	0.824	0.274	0	2	CXCL16
HLA-DQA1	0	1.09204	0.916	0.371	0	2	HLA-DQA1
GGTA1P	0	2.82538	0.675	0.13	0	2	GGTA1P
SLC40A1	0	3.89955	0.943	0.401	0	2	SLC40A1
RNASET2	0	2.30221	0.935	0.394	0	2	RNASET2
PRNP	0	2.60292	0.737	0.198	0	2	PRNP
FYB11	0	1.45663	0.905	0.368	0	2	FYB1
HLA-DMB	0	1.55165	0.862	0.327	0	2	HLA-DMB
CETP	0	4.47228	0.61	0.078	0	2	CETP
C1orf54	0	2.15612	0.696	0.166	0	2	C1orf54
CCR1	0	3.44527	0.604	0.078	0	2	CCR1
CD4	0	2.00464	0.761	0.236	0	2	CD4
AXL	0	4.16679	0.58	0.055	0	2	AXL
ASAH1	0	2.11028	0.923	0.401	0	2	ASAH1
TNFAIP2	0	2.36651	0.702	0.182	0	2	TNFAIP2
ADA2	0	2.24872	0.727	0.208	0	2	ADA2
MFSD1	0	2.36478	0.835	0.316	0	2	MFSD1
NPL	0	2.65195	0.618	0.101	0	2	NPL
FUCA1	0	3.13565	0.713	0.203	0	2	FUCA1
CTSL	0	1.6653	0.882	0.373	0	2	CTSL
CTSC	0	2.2267	0.923	0.416	0	2	CTSC
SIGLEC1	0	4.90458	0.537	0.031	0	2	SIGLEC1
SLCO2B1	0	3.21493	0.632	0.126	0	2	SLCO2B1
HCK	0	1.78853	0.697	0.197	0	2	HCK
MCOLN1	0	3.81482	0.561	0.065	0	2	MCOLN1
HLA-DQB1	0	0.896594	0.909	0.413	0	2	HLA-DQB1
CFP	0	3.28348	0.652	0.157	0	2	CFP
HCLS1	0	1.49645	0.834	0.341	0	2	HCLS1
TBXAS1	0	2.37264	0.629	0.137	0	2	TBXAS1
SPI1	0	1.28953	0.755	0.263	0	2	SPI1
TGFBI	0	1.95878	0.87	0.378	0	2	TGFBI
TPP1	0	2.53614	0.845	0.353	0	2	TPP1
C1orf162	0	1.04563	0.778	0.292	0	2	C1orf162
RGL1	0	3.6197	0.547	0.063	0	2	RGL1
KCTD12	0	1.84388	0.672	0.19	0	2	KCTD12
MARCKS	0	1.79269	0.828	0.346	0	2	MARCKS
SGK1	0	1.38472	0.853	0.372	0	2	SGK1
MARCO	0	6.35909	0.557	0.077	0	2	MARCO
FRMD4B	0	2.27917	0.664	0.184	0	2	FRMD4B
SAMHD1	0	1.4176	0.808	0.329	0	2	SAMHD1
LGALS9	0	1.90037	0.686	0.208	0	2	LGALS9
LRP1	0	2.64187	0.679	0.201	0	2	LRP1
VMO1	0	3.35045	0.549	0.072	0	2	VMO1
LILRB2	0	2.01622	0.615	0.138	0	2	LILRB2
GPR34	0	3.66844	0.525	0.05	0	2	GPR34
SAMSN11	0	1.41197	0.689	0.214	0	2	SAMSN1
C5AR1	0	1.88648	0.615	0.141	0	2	C5AR1
PPT1	0	1.78668	0.794	0.322	0	2	PPT1
BLVRA	0	2.44651	0.614	0.143	0	2	BLVRA
FCHO2	0	2.38102	0.627	0.157	0	2	FCHO2
LY96	0	2.23544	0.648	0.179	0	2	LY96
ZEB2	0	1.76132	0.667	0.199	0	2	ZEB2
NAGK	0	2.07108	0.704	0.236	0	2	NAGK
CREG1	0	2.44506	0.911	0.444	0	2	CREG1
LAPTM5	0	1.41152	0.939	0.472	0	2	LAPTM5
FMNL2	0	3.26413	0.535	0.069	0	2	FMNL2
UCP2	0	1.55091	0.746	0.28	0	2	UCP2
LILRB4	0	2.63893	0.565	0.1	0	2	LILRB4
IL10RA	0	2.13117	0.642	0.18	0	2	IL10RA
SCIMP	0	2.27638	0.598	0.137	0	2	SCIMP
EPB41L3	0	3.10573	0.531	0.071	0	2	EPB41L3
BASP1	0	1.95991	0.627	0.169	0	2	BASP1
TSPAN4	0	2.31445	0.668	0.211	0	2	TSPAN4
IL18	0	2.1248	0.602	0.145	0	2	IL18
LGALS3BP	0	2.38426	0.648	0.192	0	2	LGALS3BP
HLA-DRB6	0	1.5547	0.819	0.363	0	2	HLA-DRB6
CXCR2P1	0	5.09024	0.48	0.024	0	2	CXCR2P1
CTSZ	0	2.18496	0.903	0.448	0	2	CTSZ
TYROBP	0	2.00421	0.992	0.537	0	2	TYROBP
LY86	0	1.71823	0.634	0.18	0	2	LY86
CD86	0	1.63248	0.636	0.183	0	2	CD86
LILRB1	0	2.99547	0.53	0.078	0	2	LILRB1
CTSS	0	2.14515	0.99	0.539	0	2	CTSS
FPR3	0	2.77698	0.537	0.087	0	2	FPR3
LCP21	0	1.52491	0.677	0.228	0	2	LCP2
NCKAP1L	0	1.89309	0.642	0.193	0	2	NCKAP1L
ITGB21	0	1.01649	0.819	0.37	0	2	ITGB2
HLA-DMA	0	1.4829	0.919	0.472	0	2	HLA-DMA
PLEK	0	1.12527	0.74	0.295	0	2	PLEK
GAA	0	2.70796	0.599	0.154	0	2	GAA
TIMP2	0	1.80243	0.612	0.168	0	2	TIMP2
MERTK	0	3.17129	0.531	0.091	0	2	MERTK
P2RY13	0	2.46648	0.538	0.098	0	2	P2RY13
MPP1	0	2.44755	0.584	0.144	0	2	MPP1
SLC15A3	0	2.81535	0.52	0.094	0	2	SLC15A3
SMPDL3A	0	2.81358	0.583	0.158	0	2	SMPDL3A
WWP1	0	2.10735	0.663	0.245	0	2	WWP1
PLTP	0	3.09217	0.481	0.063	0	2	PLTP
PILRA	0	1.56166	0.584	0.166	0	2	PILRA
NINJ1	0	2.09723	0.744	0.328	0	2	NINJ1
TIMD4	0	6.02676	0.433	0.017	0	2	TIMD4
NRP1	0	1.66596	0.578	0.163	0	2	NRP1
HLA-DPA1	0	1.52579	0.99	0.576	0	2	HLA-DPA1
TLR4	0	2.1554	0.523	0.11	0	2	TLR4
PYCARD	0	1.26378	0.695	0.282	0	2	PYCARD
IQGAP11	0	1.4678	0.875	0.462	0	2	IQGAP1
2025-03-01	0	1.9823	0.542	0.13	0	2	2025-03-01
FCGRT	0	2.5571	0.962	0.55	0	2	FCGRT
ZFYVE16	0	2.5938	0.553	0.142	0	2	ZFYVE16
CD300A	0	2.0465	0.538	0.128	0	2	CD300A
CTSA	0	1.992	0.751	0.344	0	2	CTSA
LRRC25	0	2.56549	0.496	0.089	0	2	LRRC25
FEZ2	0	2.1451	0.57	0.166	0	2	FEZ2
PLA2G7	0	2.61875	0.47	0.067	0	2	PLA2G7
GLUL1	0	1.23115	0.943	0.54	0	2	GLUL
GRN	0	2.0534	0.944	0.543	0	2	GRN
ABCA1	0	3.00471	0.506	0.106	0	2	ABCA1
RAB31	0	1.43393	0.609	0.209	0	2	RAB31
HLA-DPB1	0	1.16644	0.99	0.59	0	2	HLA-DPB1
TNFSF13B	0	1.50697	0.566	0.17	0	2	TNFSF13B
CTSD	0	2.46074	0.95	0.555	0	2	CTSD
ME1	0	3.42168	0.449	0.056	0	2	ME1
RNF130	0	1.44058	0.794	0.402	0	2	RNF130
NR1H3	0	3.11997	0.511	0.12	0	2	NR1H3
FRMD4A	0	3.36058	0.453	0.062	0	2	FRMD4A
CLIC2	0	2.11649	0.538	0.148	0	2	CLIC2
CCL31	0	1.63477	0.773	0.383	0	2	CCL3
EBI3	0	3.25335	0.427	0.038	0	2	EBI3
ITSN1	0	2.41426	0.544	0.155	0	2	ITSN1
CD14	0	1.49163	0.856	0.467	0	2	CD14
NPC2	0	2.10908	0.976	0.589	0	2	NPC2
TFEC	0	2.23295	0.48	0.097	0	2	TFEC
ME2	0	1.80201	0.56	0.178	0	2	ME2
WSB1	0	2.15677	0.737	0.355	0	2	WSB1
GNB4	0	2.2347	0.497	0.115	0	2	GNB4
SLC7A7	0	2.40967	0.475	0.093	0	2	SLC7A7
CCDC88A	0	1.32851	0.684	0.303	0	2	CCDC88A
AOAH1	0	1.46499	0.572	0.191	0	2	AOAH
CD33	0	2.32175	0.479	0.099	0	2	CD33
SNX10	0	1.86423	0.665	0.286	0	2	SNX10
BLVRB	0	1.88422	0.831	0.452	0	2	BLVRB
LCP11	0	0.574908	0.896	0.519	0	2	LCP1
RAB20	0	1.99107	0.523	0.146	0	2	RAB20
SNX6	0	1.41921	0.778	0.402	0	2	SNX6
KCNMA1	0	3.37271	0.429	0.053	0	2	KCNMA1
CYBA	0	1.40249	0.97	0.595	0	2	CYBA
PHACTR2	0	1.76914	0.518	0.143	0	2	PHACTR2
CMKLR1	0	4.096	0.403	0.028	0	2	CMKLR1
FNBP11	0	1.2354	0.685	0.311	0	2	FNBP1
DST	0	1.93767	0.672	0.299	0	2	DST
GNS	0	1.98518	0.609	0.236	0	2	GNS
CD531	0	0.686334	0.774	0.401	0	2	CD53
ATP2B1	0	1.56968	0.661	0.289	0	2	ATP2B1
KLF4	0	1.38814	0.583	0.212	0	2	KLF4
THEMIS2	0	1.51549	0.553	0.183	0	2	THEMIS2
RAB32	0	1.94483	0.595	0.225	0	2	RAB32
TIMP1	0	0.72348	0.816	0.446	0	2	TIMP1
PIK3AP1	0	1.92427	0.551	0.184	0	2	PIK3AP1
VIM	0	0.918645	0.901	0.534	0	2	VIM
SDCBP	0	1.24575	0.867	0.5	0	2	SDCBP
SUCNR1	0	4.56119	0.393	0.026	0	2	SUCNR1
RGS11	0	0.708677	0.895	0.529	0	2	RGS1
PFKFB3	0	1.98101	0.503	0.139	0	2	PFKFB3
FABP3	0	4.17336	0.387	0.024	0	2	FABP3
SELENOP1	0	1.77035	0.954	0.591	0	2	SELENOP
LYN	0	1.22141	0.62	0.257	0	2	LYN
RAP2B	0	2.07455	0.492	0.132	0	2	RAP2B
GIMAP41	0	0.83759	0.645	0.286	0	2	GIMAP4
ICAM1	0	1.60276	0.581	0.222	0	2	ICAM1
COLGALT1	0	2.31528	0.48	0.121	0	2	COLGALT1
PTAFR	0	2.16992	0.453	0.096	0	2	PTAFR
CR1	0	3.74724	0.386	0.031	0	2	CR1
EVI2B1	0	0.718591	0.671	0.317	0	2	EVI2B
HLA-DQA2	0	1.08852	0.585	0.231	0	2	HLA-DQA2
CLEC2B1	0	0.63941	0.711	0.358	0	2	CLEC2B
CTSB	0	3.32131	0.992	0.639	0	2	CTSB
FTLP3	0	2.41772	0.484	0.131	0	2	FTLP3
QKI	0	1.69868	0.567	0.215	0	2	QKI
HLA-DRB1	0	1.52461	0.994	0.642	0	2	HLA-DRB1
GNPDA1	0	2.25704	0.464	0.113	0	2	GNPDA1
UNC93B1	0	2.24014	0.464	0.114	0	2	UNC93B1
FCGR2A	0	1.55455	0.54	0.19	0	2	FCGR2A
SLC7A8	0	3.26974	0.385	0.035	0	2	SLC7A8
ARRB2	0	1.24063	0.588	0.238	0	2	ARRB2
AKR1B1	0	1.38229	0.576	0.228	0	2	AKR1B1
NCOA4	0	1.578	0.72	0.372	0	2	NCOA4
NCF4	0	1.7531	0.479	0.132	0	2	NCF4
RASSF4	0	1.78135	0.498	0.151	0	2	RASSF4
ATP6AP1	0	1.46269	0.664	0.319	0	2	ATP6AP1
CD72	0	2.39666	0.43	0.085	0	2	CD72
CORO1B	0	1.66044	0.542	0.198	0	2	CORO1B
CYFIP1	0	2.17868	0.492	0.15	0	2	CYFIP1
ANXA5	0	1.22979	0.875	0.534	0	2	ANXA5
CALHM6	0	2.15559	0.439	0.098	0	2	CALHM6
SPIC	0	5.0086	0.351	0.012	0	2	SPIC
TCN2	0	2.30972	0.424	0.086	0	2	TCN2
COMT	0	1.61655	0.681	0.344	0	2	COMT
IFNGR1	0	1.01936	0.755	0.418	0	2	IFNGR1
SCARB2	0	1.59139	0.69	0.353	0	2	SCARB2
LPAR61	0	0.923482	0.605	0.268	0	2	LPAR6
LGALS3	0	0.784468	0.747	0.411	0	2	LGALS3
CD82	0	1.90517	0.505	0.169	0	2	CD82
DMXL2	0	2.7776	0.407	0.071	0	2	DMXL2
SIGLEC7	0	2.67663	0.398	0.063	0	2	SIGLEC7
SLC1A3	0	2.39939	0.417	0.082	0	2	SLC1A3
MGAT1	0	1.27297	0.675	0.342	0	2	MGAT1
CPM	0	1.55153	0.535	0.204	0	2	CPM
SLC31A2	0	1.8792	0.462	0.131	0	2	SLC31A2
ITGAD	0	5.14605	0.343	0.012	0	2	ITGAD
HK3	0	3.2673	0.367	0.037	0	2	HK3
CD81	0	1.3387	0.814	0.485	0	2	CD81
PRCP	0	0.874317	0.623	0.295	0	2	PRCP
CCL3L1	0	1.15103	0.637	0.309	0	2	CCL3L1
SERPINB6	0	1.31328	0.608	0.28	0	2	SERPINB6
CD441	0	1.30866	0.617	0.291	0	2	CD44
SNX5	0	1.27993	0.635	0.309	0	2	SNX5
NABP1	0	1.78277	0.449	0.123	0	2	NABP1
SLC8A1	0	2.01868	0.425	0.099	0	2	SLC8A1
SH3BGRL	0	0.839971	0.757	0.432	0	2	SH3BGRL
PARP14	0	1.52924	0.611	0.286	0	2	PARP14
TCF7L2	0	2.51853	0.427	0.103	0	2	TCF7L2
ITSN21	0	1.14106	0.681	0.358	0	2	ITSN2
DPP7	0	1.36425	0.664	0.341	0	2	DPP7
DDAH2	0	1.63787	0.527	0.207	0	2	DDAH2
SCD	0	2.45584	0.437	0.117	0	2	SCD
NCEH1	0	3.27295	0.37	0.05	0	2	NCEH1
PTPN6	0	1.24782	0.533	0.214	0	2	PTPN6
FKBP15	0	1.9426	0.454	0.135	0	2	FKBP15
TNFRSF1B	0	1.17042	0.544	0.226	0	2	TNFRSF1B
GLIPR11	0	0.649676	0.641	0.323	0	2	GLIPR1
S100A11	0	0.779001	0.934	0.618	0	2	S100A11
IFIT2	0	2.20493	0.448	0.132	0	2	IFIT2
TYMP	0	1.21014	0.628	0.313	0	2	TYMP
IFI44L	0	2.39128	0.392	0.077	0	2	IFI44L
LAIR1	0	1.96173	0.423	0.108	0	2	LAIR1
MYO9A	0	2.8671	0.384	0.07	0	2	MYO9A
RNF13	0	1.32528	0.646	0.333	0	2	RNF13
ATP1B11	0	1.45391	0.646	0.333	0	2	ATP1B1
DOK21	0	1.18637	0.466	0.155	0	2	DOK2
VAMP8	0	1.31175	0.855	0.544	0	2	VAMP8
BNIP3L	0	1.26628	0.547	0.237	0	2	BNIP3L
SCPEP1	0	1.50174	0.495	0.185	0	2	SCPEP1
TTYH3	0	2.81996	0.373	0.063	0	2	TTYH3
M6PR	0	1.41202	0.521	0.212	0	2	M6PR
MYO9B	0	1.64042	0.462	0.153	0	2	MYO9B
TKT	0	0.886212	0.677	0.368	0	2	TKT
HEXA	0	1.61805	0.545	0.236	0	2	HEXA
RHOG	0	0.953162	0.601	0.292	0	2	RHOG
MKNK1	0	2.19936	0.407	0.098	0	2	MKNK1
ACTN1	0	1.75802	0.523	0.216	0	2	ACTN1
ABI3	0	1.41964	0.452	0.145	0	2	ABI3
SNX2	0	1.18062	0.655	0.348	0	2	SNX2
FABP5	0	1.51199	0.489	0.182	0	2	FABP5
CEBPB	0	0.941455	0.73	0.423	0	2	CEBPB
SHTN1	0	1.2531	0.582	0.275	0	2	SHTN1
GM2A	0	1.85333	0.453	0.147	0	2	GM2A
RNASE6	0	1.08511	0.532	0.227	0	2	RNASE6
HNMT1	0	0.965595	0.669	0.366	0	2	HNMT
GRINA	0	1.22245	0.676	0.376	0	2	GRINA
HAVCR2	0	1.66148	0.419	0.12	0	2	HAVCR2
TMEM37	0	1.59049	0.498	0.199	0	2	TMEM37
CD163L1	0	3.18423	0.356	0.058	0	2	CD163L1
DOCK2	0	1.22797	0.482	0.185	0	2	DOCK2
IFNGR2	0	1.41921	0.487	0.19	0	2	IFNGR2
IFI6	0	1.42528	0.625	0.329	0	2	IFI6
SRGN1	0	0.549902	0.99	0.695	0	2	SRGN
TLN11	0	0.990442	0.767	0.472	0	2	TLN1
DRAM2	0	1.46628	0.51	0.215	0	2	DRAM2
NAAA	0	1.69714	0.443	0.149	0	2	NAAA
PDK4	0	1.64339	0.637	0.343	0	2	PDK4
C21	0	1.59102	0.569	0.275	0	2	C2
MYO1F	0	1.27257	0.46	0.167	0	2	MYO1F
LGALS8	0	1.6289	0.521	0.229	0	2	LGALS8
XAF1	0	1.37111	0.515	0.223	0	2	XAF1
BRI3	0	1.05873	0.739	0.447	0	2	BRI3
SLA1	0	0.665888	0.534	0.244	0	2	SLA
ADAM9	0	2.10316	0.381	0.091	0	2	ADAM9
TRIM14	0	2.63391	0.356	0.066	0	2	TRIM14
C6orf62	0	1.73406	0.478	0.188	0	2	C6orf62
ARPC1B	0	1.3616	0.475	0.186	0	2	ARPC1B
CSF3R	0	0.924196	0.435	0.147	0	2	CSF3R
SWAP70	0	1.28518	0.459	0.171	0	2	SWAP70
ENPP2	0	2.57907	0.34	0.052	0	2	ENPP2
AP1B1	0	1.88651	0.416	0.129	0	2	AP1B1
ADGRE51	0	1.02314	0.501	0.215	0	2	ADGRE5
CALM3	0	1.15368	0.684	0.398	0	2	CALM3
RNF149	0	1.13943	0.544	0.258	0	2	RNF149
DEGS1	0	1.08868	0.547	0.262	0	2	DEGS1
GRB2	0	1.02768	0.695	0.41	0	2	GRB2
ACP2	0	2.23283	0.404	0.12	0	2	ACP2
FILIP1L	0	1.90325	0.373	0.089	0	2	FILIP1L
SMS	0	1.46941	0.469	0.185	0	2	SMS
LAMP1	0	1.31315	0.64	0.357	0	2	LAMP1
C4orf48	0	1.13465	0.491	0.208	0	2	C4orf48
SASH1	0	2.20958	0.35	0.067	0	2	SASH1
H2AFY	0	0.749079	0.692	0.409	0	2	H2AFY
NDST3	0	6.23088	0.288	0.005	0	2	NDST3
SCN1B	0	3.2262	0.323	0.041	0	2	SCN1B
SNX9	0	1.70892	0.428	0.146	0	2	SNX9
KLF2	0	1.18366	0.521	0.24	0	2	KLF2
CEPT1	0	2.13511	0.396	0.115	0	2	CEPT1
TLR2	0	1.72661	0.373	0.092	0	2	TLR2
PARVG	0	1.08641	0.471	0.19	0	2	PARVG
IRF8	0	0.966143	0.43	0.151	0	2	IRF8
SKAP2	0	1.01807	0.534	0.256	0	2	SKAP2
LPCAT2	0	1.78317	0.387	0.109	0	2	LPCAT2
BMP2K	0	2.02442	0.372	0.094	0	2	BMP2K
ST8SIA4	0	1.55561	0.396	0.119	0	2	ST8SIA4
GNAI2	0	0.736161	0.854	0.577	0	2	GNAI2
FERMT3	0	1.33333	0.432	0.155	0	2	FERMT3
PLA2G15	0	3.65127	0.308	0.032	0	2	PLA2G15
P4HA11	0	1.79333	0.431	0.155	0	2	P4HA1
ITLN1	0	4.06117	0.286	0.01	0	2	ITLN1
PYGL1	0	1.82557	0.483	0.209	0	2	PYGL
ACP5	0	0.701084	0.422	0.149	0	2	ACP5
[truncated: 22,632 more rows]
